# Supplementary material for: Low Expression of miR-20a-5p Predicts Benefit to Bevacizumab in Metastatic Breast Cancer Patients Treated within the TANIA Phase III Trial
Source: PubMed Central journal article supplement (PMC7355487; doi:10.3390/jcm9061663), 2020-06-01

## Supplementary

**Table S1.** Differentially expressed miRNAs between responder (R) and non-responder (NR) group based on median PFS in the learning set.

| ID   | NAME            | #N<br>R | #<br>R | NR_MEAN | R_MEAN | AVE_EXP<br>R | LOG2FC | T    | P       | ADJ_P(BH) | SELECTED |
|------|-----------------|---------|--------|---------|--------|--------------|--------|------|---------|-----------|----------|
| 396  | hsa-miR-19b-3p  | 28      | 29     | 1,28    | 2,74   | 2,02         | -1,46  | 3,61 | 0,00062 | 0,086     | 1        |
| 397  | hsa-miR-21-5p   | 26      | 28     | 1,71    | 3,27   | 2,52         | -1,56  | 3,59 | 0,00069 | 0,086     | 1        |
| 583  | hsa-miR-9-5p    | 21      | 18     | 6,67    | 8,62   | 7,57         | -1,95  | 3,51 | 0,00111 | 0,086     | 1        |
| 1984 | hsa-miR-590-5p  | 25      | 28     | 7,24    | 8,44   | 7,87         | -1,20  | 3,41 | 0,00124 | 0,086     | 1        |
| 442  | hsa-miR-106b-5p | 25      | 27     | 5,93    | 7,02   | 6,50         | -1,08  | 3,36 | 0,00145 | 0,086     | 1        |
| 580  | hsa-miR-20a-5p  | 25      | 28     | 3,06    | 4,59   | 3,86         | -1,53  | 3,34 | 0,00153 | 0,086     | 1        |
| 395  | hsa-miR-19a-3p  | 25      | 26     | 5,24    | 6,84   | 6,06         | -1,60  | 3,32 | 0,00163 | 0,086     | 1        |
| 408  | hsa-miR-27a-3p  | 25      | 26     | 5,35    | 6,63   | 6,00         | -1,28  | 3,29 | 0,00175 | 0,086     | 0        |
| 480  | hsa-miR-181a-5p | 26      | 27     | 5,70    | 6,71   | 6,21         | -1,01  | 3,11 | 0,00300 | 0,130     | 0        |
| 1187 | hsa-miR-140-5p  | 25      | 27     | 4,87    | 5,99   | 5,45         | -1,12  | 3,06 | 0,00345 | 0,130     | 0        |
| 2249 | hsa-miR-143-3p  | 25      | 27     | 4,65    | 5,83   | 5,26         | -1,18  | 3,04 | 0,00366 | 0,130     | 0        |
| 464  | hsa-miR-142-3p  | 25      | 23     | 5,90    | 7,14   | 6,49         | -1,24  | 2,97 | 0,00453 | 0,138     | 0        |
| 1090 | hsa-miR-93-5p   | 25      | 28     | 3,70    | 4,87   | 4,32         | -1,17  | 2,96 | 0,00457 | 0,138     | 0        |
| 2341 | hsa-miR-708-5p  | 25      | 28     | 6,03    | 7,41   | 6,76         | -1,38  | 2,92 | 0,00499 | 0,140     | 0        |
| 512  | hsa-miR-210-3p  | 26      | 28     | 3,72    | 4,83   | 4,30         | -1,12  | 2,85 | 0,00617 | 0,154     | 1        |
| 2173 | hsa-miR-15b-3p  | 22      | 17     | 8,49    | 9,52   | 8,94         | -1,03  | 2,85 | 0,00679 | 0,154     | 0        |
| 426  | hsa-miR-34a-5p  | 25      | 27     | 4,57    | 5,56   | 5,09         | -0,99  | 2,75 | 0,00808 | 0,154     | 0        |
| 563  | hsa-miR-374a-5p | 25      | 26     | 6,78    | 7,69   | 7,24         | -0,91  | 2,74 | 0,00828 | 0,154     | 0        |
| 377  | hsa-let-7a-5p   | 27      | 28     | 5,18    | 6,47   | 5,83         | -1,29  | 2,72 | 0,00858 | 0,154     | 0        |
| 2406 | hsa-let-7e-5p   | 27      | 28     | 2,74    | 3,78   | 3,27         | -1,03  | 2,72 | 0,00866 | 0,154     | 0        |
| 1024 | hsa-miR-429     | 28      | 28     | 5,85    | 7,36   | 6,60         | -1,51  | 2,71 | 0,00876 | 0,154     | 0        |
| 2169 | hsa-miR-106a-5p | 27      | 28     | 1,10    | 2,21   | 1,66         | -1,11  | 2,70 | 0,00916 | 0,154     | 0        |
| 1515 | hsa-miR-660-5p  | 25      | 25     | 5,50    | 6,59   | 6,05         | -1,09  | 2,68 | 0,00994 | 0,154     | 0        |
| 439  | hsa-miR-103a-3p | 26      | 26     | 5,17    | 6,12   | 5,64         | -0,95  | 2,66 | 0,01023 | 0,154     | 0        |
| 2323 | hsa-miR-454-3p  | 29      | 28     | 3,72    | 4,78   | 4,24         | -1,06  | 2,64 | 0,01050 | 0,154     | 0        |
| 2099 | hsa-miR-224-5p  | 22      | 24     | 6,56    | 7,98   | 7,31         | -1,42  | 2,65 | 0,01097 | 0,154     | 1        |
| 390  | hsa-miR-15b-5p  | 25      | 27     | 6,06    | 7,02   | 6,56         | -0,96  | 2,63 | 0,01120 | 0,154     | 0        |
| 2217 | hsa-miR-18b-5p  | 17      | 18     | 6,71    | 9,57   | 8,18         | -2,87  | 2,66 | 0,01147 | 0,154     | 0        |
| 521  | hsa-miR-218-5p  | 25      | 26     | 7,14    | 8,10   | 7,63         | -0,96  | 2,61 | 0,01158 | 0,154     | 0        |
| 2161 | hsa-miR-324-3p  | 26      | 26     | 6,60    | 7,52   | 7,06         | -0,91  | 2,61 | 0,01178 | 0,154     | 0        |
| 2623 | hsa-miR-155-5p  | 26      | 28     | 3,24    | 4,17   | 3,72         | -0,93  | 2,57 | 0,01277 | 0,156     | 1        |
| 463  | hsa-miR-141-3p  | 27      | 27     | 4,78    | 5,97   | 5,37         | -1,19  | 2,57 | 0,01299 | 0,156     | 0        |
| 2308 | hsa-miR-17-5p   | 27      | 28     | 1,01    | 2,07   | 1,55         | -1,06  | 2,56 | 0,01319 | 0,156     | 0        |

| ID   | NAME            | #N<br>R | #<br>R | NR_MEAN | R_MEAN | AVE_EXP<br>R | LOG2FC | T         | P           | ADJ_P(BH) | SELECTED |
|------|-----------------|---------|--------|---------|--------|--------------|--------|-----------|-------------|-----------|----------|
| 2084 | hsa-miR-504-5p  | 9       | 15     | -0,06   | 5,35   | 3,32         | -5,40  | -<br>2,65 | 0,0135<br>2 | 0,156     | 0        |
| 411  | hsa-miR-28-5p   | 25      | 24     | 7,16    | 8,24   | 7,69         | -1,07  | -<br>2,48 | 0,0165<br>4 | 0,185     | 1        |
| 1516 | hsa-miR-425-5p  | 25      | 28     | 4,29    | 5,18   | 4,76         | -0,89  | -<br>2,45 | 0,0176<br>6 | 0,192     | 0        |
| 2428 | hsa-miR-500a-5p | 23      | 21     | 8,26    | 9,56   | 8,88         | -1,30  | -<br>2,45 | 0,0182<br>2 | 0,193     | 0        |
| 507  | hsa-miR-203a    | 25      | 24     | 5,24    | 6,81   | 6,01         | -1,57  | -<br>2,42 | 0,0189<br>8 | 0,196     | 0        |
| 577  | hsa-miR-98-5p   | 19      | 14     | 8,91    | 9,91   | 9,33         | -1,00  | -<br>2,42 | 0,0206<br>2 | 0,206     | 0        |
| 2446 | hsa-miR-28-3p   | 27      | 29     | 3,86    | 4,75   | 4,32         | -0,89  | -<br>2,37 | 0,0213<br>5 | 0,206     | 0        |
| 2275 | hsa-miR-370-3p  | 25      | 24     | 6,79    | 7,96   | 7,37         | -1,17  | -<br>2,36 | 0,0223<br>6 | 0,206     | 0        |
| 433  | hsa-miR-95-3p   | 25      | 26     | 7,68    | 8,55   | 8,13         | -0,87  | -<br>2,35 | 0,0223<br>9 | 0,206     | 0        |
| 1518 | hsa-miR-532-5p  | 25      | 25     | 5,83    | 7,04   | 6,43         | -1,21  | -<br>2,35 | 0,0225<br>5 | 0,206     | 0        |
| 1149 | hsa-miR-516a-3p | 10      | 6      | 12,20   | 9,84   | 11,31        | 2,36   | -<br>2,42 | 0,0261<br>5 | 0,233     | 0        |
| 468  | hsa-miR-146a-5p | 29      | 29     | 1,69    | 2,56   | 2,12         | -0,88  | -<br>2,23 | 0,0294<br>1 | 0,256     | 0        |
| 2122 | hsa-miR-376c-3p | 25      | 24     | 7,16    | 8,02   | 7,58         | -0,86  | -<br>2,20 | 0,0320<br>4 | 0,273     | 0        |
| 2412 | hsa-miR-548a-5p | 18      | 17     | 7,09    | 8,83   | 7,93         | -1,74  | -<br>2,22 | 0,0328<br>1 | 0,274     | 0        |
| 2329 | hsa-miR-452-5p  | 21      | 19     | 8,30    | 9,34   | 8,80         | -1,04  | -<br>2,19 | 0,0337<br>5 | 0,276     | 0        |
| 1111 | hsa-miR-511-5p  | 19      | 16     | 9,79    | 8,88   | 9,38         | 0,92   | -<br>2,19 | 0,0346<br>4 | 0,276     | 0        |
| 1319 | hsa-miR-374b-5p | 27      | 28     | 3,83    | 4,89   | 4,37         | -1,06  | -<br>2,16 | 0,0351<br>8 | 0,276     | 0        |
| 2304 | hsa-miR-199b-3p | 29      | 29     | 2,46    | 3,50   | 2,98         | -1,05  | -<br>2,11 | 0,0385<br>8 | 0,289     | 0        |
| 2258 | hsa-miR-340-5p  | 25      | 21     | 8,63    | 9,39   | 8,97         | -0,76  | -<br>2,12 | 0,0388<br>4 | 0,289     | 0        |
| 457  | hsa-miR-132-3p  | 26      | 27     | 5,21    | 5,92   | 5,57         | -0,71  | -<br>2,11 | 0,0391<br>4 | 0,289     | 0        |
| 417  | hsa-miR-30a-5p  | 27      | 28     | 3,75    | 4,80   | 4,28         | -1,06  | -<br>2,10 | 0,0400<br>6 | 0,289     | 0        |
| 403  | hsa-miR-25-3p   | 24      | 24     | 7,14    | 8,00   | 7,57         | -0,86  | -<br>2,10 | 0,0404<br>9 | 0,289     | 0        |
| 389  | hsa-miR-15a-5p  | 23      | 19     | 6,90    | 8,57   | 7,66         | -1,67  | -<br>2,09 | 0,0422<br>9 | 0,291     | 0        |
| 2380 | hsa-miR-106b-3p | 24      | 22     | 8,03    | 8,81   | 8,40         | -0,78  | -<br>2,09 | 0,0423<br>2 | 0,291     | 0        |
| 2438 | hsa-miR-21-3p   | 25      | 22     | 5,55    | 6,42   | 5,96         | -0,87  | -<br>2,06 | 0,0449<br>3 | 0,300     | 0        |
| 528  | hsa-miR-301a-3p | 23      | 19     | 8,64    | 9,56   | 9,06         | -0,92  | -<br>2,06 | 0,0456<br>3 | 0,300     | 0        |
| 494  | hsa-miR-195-5p  | 27      | 28     | 3,43    | 5,04   | 4,25         | -1,62  | -<br>2,04 | 0,0458<br>5 | 0,300     | 0        |
| 2392 | hsa-miR-301b    | 14      | 11     | 10,27   | 11,38  | 10,76        | -1,10  | -<br>2,07 | 0,0478<br>9 | 0,304     | 0        |
| 2410 | hsa-miR-550a-5p | 14      | 15     | 9,58    | 10,99  | 10,31        | -1,41  | -<br>2,06 | 0,0481<br>1 | 0,304     | 0        |
| 497  | hsa-miR-197-3p  | 25      | 26     | 5,18    | 6,08   | 5,64         | -0,90  | -<br>1,96 | 0,0547<br>7 | 0,341     | 0        |
| 407  | hsa-miR-26b-5p  | 26      | 28     | 4,66    | 5,46   | 5,08         | -0,80  | -<br>1,93 | 0,0589<br>1 | 0,359     | 0        |
| 2283 | hsa-let-7d-5p   | 26      | 27     | 6,16    | 6,82   | 6,49         | -0,65  | -<br>1,92 | 0,0595<br>4 | 0,359     | 0        |
| 539  | hsa-miR-324-5p  | 25      | 20     | 8,10    | 8,78   | 8,40         | -0,68  | -<br>1,92 | 0,0607<br>2 | 0,361     | 0        |
| 2285 | hsa-miR-186-5p  | 28      | 29     | 3,89    | 4,59   | 4,25         | -0,70  | -<br>1,90 | 0,0624<br>1 | 0,363     | 0        |
| 2278 | hsa-miR-145-5p  | 29      | 29     | 1,49    | 2,29   | 1,89         | -0,80  | -<br>1,88 | 0,0649<br>4 | 0,363     | 0        |
| 460  | hsa-miR-135a-5p | 15      | 10     | 10,39   | 9,31   | 9,96         | 1,07   | -<br>1,92 | 0,0650<br>3 | 0,363     | 0        |

| ID   | NAME            | #N<br>R | #<br>R | NR_MEAN | R_MEAN | AVE_EXP<br>R | LOG2FC | T    | P       | ADJ_P(BH) | SELECTED |
|------|-----------------|---------|--------|---------|--------|--------------|--------|------|---------|-----------|----------|
| 431  | hsa-miR-92a-3p  | 25      | 27     | 5,50    | 6,18   | 5,85         | -0,69  | 1,88 | 0,06563 | 0,363     | 0        |
| 2100 | hsa-miR-136-3p  | 11      | 8      | 11,30   | 9,67   | 10,62        | 1,63   | 1,94 | 0,06582 | 0,363     | 0        |
| 449  | hsa-miR-125b-5p | 26      | 28     | 3,78    | 4,63   | 4,22         | -0,85  | 1,87 | 0,06738 | 0,367     | 0        |
| 1612 | hsa-miR-655-3p  | 16      | 9      | 10,35   | 9,11   | 9,90         | 1,24   | 1,88 | 0,07012 | 0,369     | 0        |
| 2282 | hsa-let-7g-5p   | 27      | 28     | 4,32    | 4,89   | 4,61         | -0,57  | 1,84 | 0,07093 | 0,369     | 0        |
| 402  | hsa-miR-24-3p   | 27      | 28     | -0,46   | 0,16   | -0,15        | -0,62  | 1,84 | 0,07095 | 0,369     | 0        |
| 435  | hsa-miR-99a-5p  | 25      | 28     | 4,58    | 5,37   | 5,00         | -0,78  | 1,83 | 0,07270 | 0,369     | 0        |
| 2231 | hsa-miR-9-3p    | 15      | 13     | 9,38    | 10,62  | 9,96         | -1,24  | 1,86 | 0,07306 | 0,369     | 0        |
| 2261 | hsa-miR-135b-5p | 23      | 15     | 7,25    | 8,54   | 7,76         | -1,29  | 1,84 | 0,07372 | 0,369     | 0        |
| 2352 | hsa-miR-652-3p  | 26      | 26     | 6,54    | 7,25   | 6,90         | -0,71  | 1,82 | 0,07431 | 0,369     | 0        |
| 2112 | hsa-miR-29a-3p  | 29      | 29     | 1,42    | 2,10   | 1,76         | -0,68  | 1,81 | 0,07564 | 0,371     | 0        |
| 419  | hsa-miR-30c-5p  | 27      | 28     | 2,49    | 3,12   | 2,81         | -0,63  | 1,77 | 0,08274 | 0,400     | 0        |
| 2363 | hsa-miR-202-3p  | 26      | 23     | 8,32    | 9,18   | 8,72         | -0,85  | 1,76 | 0,08442 | 0,404     | 0        |
| 2399 | hsa-miR-582-3p  | 29      | 28     | 3,65    | 4,70   | 4,16         | -1,05  | 1,71 | 0,09224 | 0,431     | 0        |
| 452  | hsa-miR-127-3p  | 26      | 26     | 6,74    | 7,81   | 7,28         | -1,07  | 1,71 | 0,09341 | 0,431     | 0        |
| 2243 | hsa-miR-378     | 29      | 27     | 4,85    | 6,03   | 5,42         | -1,19  | 1,70 | 0,09461 | 0,431     | 0        |
| 1541 | hsa-miR-548b-3p | 14      | 11     | 11,29   | 10,18  | 10,80        | 1,11   | 1,73 | 0,09465 | 0,431     | 0        |
| 1531 | hsa-miR-564     | 18      | 19     | 10,96   | 9,68   | 10,31        | 1,28   | 1,68 | 0,10086 | 0,454     | 0        |
| 2212 | hsa-miR-888-5p  | 18      | 17     | 2,78    | 6,17   | 4,43         | -3,39  | 1,68 | 0,10189 | 0,454     | 0        |
| 554  | hsa-miR-361-5p  | 22      | 22     | 10,19   | 9,18   | 9,68         | 1,01   | 1,66 | 0,10388 | 0,456     | 0        |
| 2235 | hsa-miR-509-5p  | 26      | 27     | 3,28    | 4,85   | 4,08         | -1,57  | 1,65 | 0,10562 | 0,456     | 0        |
| 2146 | hsa-miR-143-5p  | 17      | 7      | 10,09   | 8,66   | 9,67         | 1,43   | 1,67 | 0,10707 | 0,456     | 0        |
| 493  | hsa-miR-194-5p  | 20      | 23     | 8,39    | 7,11   | 7,70         | 1,28   | 1,64 | 0,10784 | 0,456     | 0        |
| 2088 | hsa-miR-636     | 26      | 26     | 8,51    | 9,55   | 9,03         | -1,04  | 1,63 | 0,10828 | 0,456     | 0        |
| 1047 | hsa-miR-501-5p  | 15      | 21     | 7,71    | 8,53   | 8,19         | -0,82  | 1,64 | 0,10990 | 0,458     | 0        |
| 398  | hsa-miR-22-3p   | 24      | 24     | 6,45    | 7,37   | 6,91         | -0,91  | 1,61 | 0,11340 | 0,468     | 0        |
| 2327 | hsa-miR-672     | 11      | 11     | 7,06    | 10,86  | 8,96         | -3,79  | 1,63 | 0,11636 | 0,475     | 0        |
| 2433 | hsa-miR-628-5p  | 29      | 29     | 6,96    | 7,96   | 7,46         | -1,00  | 1,59 | 0,11747 | 0,475     | 0        |
| 1277 | hsa-miR-485-3p  | 18      | 13     | 9,30    | 10,17  | 9,67         | -0,87  | 1,59 | 0,12036 | 0,481     | 0        |
| 409  | hsa-miR-27b-3p  | 26      | 23     | 7,53    | 8,21   | 7,85         | -0,68  | 1,56 | 0,12538 | 0,492     | 0        |
| 451  | hsa-miR-126-5p  | 23      | 23     | 8,29    | 7,39   | 7,84         | 0,91   | 1,56 | 0,12543 | 0,492     | 0        |
| 2301 | hsa-miR-22-5p   | 19      | 14     | 9,38    | 10,07  | 9,67         | -0,68  | 1,53 | 0,13569 | 0,518     | 0        |
| 2338 | hsa-miR-483-5p  | 26      | 25     | 7,64    | 8,38   | 8,00         | -0,74  | 1,51 | 0,13620 | 0,518     | 0        |
| 514  | hsa-miR-211-5p  | 12      | 8      | 11,53   | 10,27  | 11,03        | 1,26   | 1,55 | 0,13630 | 0,518     | 0        |
| 475  | hsa-miR-152-3p  | 26      | 27     | 6,47    | 6,99   | 6,73         | -0,52  | 1,51 | 0,13736 | 0,518     | 0        |
| 379  | hsa-let-7c-5p   | 27      | 27     | 6,45    | 7,24   | 6,85         | -0,80  | 1,50 | 0,13874 | 0,518     | 0        |

| ID   | NAME             | #N<br>R | #<br>R | NR_MEAN | R_MEAN | AVE_EXP<br>R | LOG2FC | T    | P       | ADJ_P(BH) | SELECTED |
|------|------------------|---------|--------|---------|--------|--------------|--------|------|---------|-----------|----------|
| 2409 | hsa-miR-589-5p   | 11      | 7      | 10,60   | 12,78  | 11,45        | -2,19  | 1,53 | 0,14140 | 0,523     | 0        |
| 2174 | hsa-miR-27b-5p   | 17      | 14     | 9,99    | 9,21   | 9,64         | 0,78   | 1,49 | 0,14565 | 0,529     | 0        |
| 2148 | hsa-miR-144-5p   | 14      | 9      | 11,25   | 10,42  | 10,92        | 0,82   | 1,50 | 0,14631 | 0,529     | 0        |
| 2215 | hsa-miR-196b-5p  | 29      | 29     | 5,46    | 6,40   | 5,93         | -0,94  | 1,46 | 0,14890 | 0,529     | 0        |
| 2162 | hsa-miR-138-1-3p | 11      | 9      | 12,17   | 11,11  | 11,69        | 1,06   | 1,49 | 0,15081 | 0,529     | 0        |
| 2302 | hsa-miR-425-3p   | 23      | 21     | 9,48    | 8,64   | 9,08         | 0,84   | 1,46 | 0,15196 | 0,529     | 0        |
| 2293 | hsa-miR-214-5p   | 24      | 25     | 7,82    | 8,51   | 8,17         | -0,69  | 1,45 | 0,15277 | 0,529     | 0        |
| 2172 | hsa-let-7i-3p    | 11      | 9      | 10,33   | 11,15  | 10,70        | -0,81  | 1,48 | 0,15317 | 0,529     | 0        |
| 2403 | hsa-miR-519d-3p  | 15      | 14     | 9,78    | 10,73  | 10,24        | -0,96  | 1,46 | 0,15459 | 0,529     | 0        |
| 1152 | hsa-miR-517b     | 26      | 23     | 7,42    | 7,91   | 7,65         | -0,49  | 1,44 | 0,15524 | 0,529     | 0        |
| 443  | hsa-miR-107      | 15      | 15     | 8,86    | 9,57   | 9,21         | -0,71  | 1,45 | 0,15744 | 0,529     | 0        |
| 2332 | hsa-miR-409-3p   | 25      | 24     | 6,89    | 7,75   | 7,31         | -0,85  | 1,43 | 0,15804 | 0,529     | 0        |
| 2619 | hsa-let-7b-5p    | 28      | 28     | 1,33    | 2,13   | 1,73         | -0,80  | 1,43 | 0,15914 | 0,529     | 0        |
| 2300 | hsa-miR-200c-3p  | 27      | 28     | -0,69   | -0,13  | -0,41        | -0,56  | 1,42 | 0,16095 | 0,530     | 0        |
| 1273 | hsa-miR-362-5p   | 25      | 23     | 7,49    | 8,03   | 7,75         | -0,54  | 1,41 | 0,16414 | 0,536     | 0        |
| 1567 | hsa-miR-604      | 9       | 14     | 11,33   | 8,95   | 9,88         | 2,38   | 1,42 | 0,16716 | 0,542     | 0        |
| 602  | hsa-miR-30b-5p   | 27      | 29     | 3,30    | 3,74   | 3,53         | -0,44  | 1,39 | 0,17016 | 0,547     | 0        |
| 1663 | hsa-miR-495-3p   | 20      | 11     | 9,40    | 9,96   | 9,60         | -0,56  | 1,38 | 0,17535 | 0,551     | 0        |
| 516  | hsa-miR-181a-3p  | 19      | 15     | 9,90    | 10,43  | 10,13        | -0,53  | 1,38 | 0,17628 | 0,551     | 0        |
| 502  | hsa-miR-200a-3p  | 26      | 28     | 5,10    | 5,63   | 5,38         | -0,53  | 1,37 | 0,17767 | 0,551     | 0        |
| 545  | hsa-miR-331-3p   | 28      | 29     | 2,73    | 3,15   | 2,94         | -0,42  | 1,36 | 0,17787 | 0,551     | 0        |
| 2332 | hsa-miR-409-3p   | 24      | 26     | 6,65    | 7,42   | 7,05         | -0,77  | 1,36 | 0,17855 | 0,551     | 0        |
| 2164 | hsa-miR-149-3p   | 17      | 12     | 8,57    | 6,70   | 7,79         | 1,86   | 1,37 | 0,17996 | 0,551     | 0        |
| 2194 | hsa-miR-886-3p   | 26      | 27     | 3,82    | 4,74   | 4,29         | -0,92  | 1,33 | 0,18885 | 0,574     | 0        |
| 2344 | hsa-miR-556-5p   | 16      | 10     | 7,70    | 10,84  | 8,91         | -3,14  | 1,33 | 0,19250 | 0,580     | 0        |
| 405  | hsa-miR-26a-5p   | 27      | 28     | 2,15    | 2,64   | 2,40         | -0,49  | 1,31 | 0,19377 | 0,580     | 0        |
| 1014 | hsa-miR-20b-5p   | 25      | 25     | 7,49    | 8,04   | 7,77         | -0,55  | 1,31 | 0,19522 | 0,580     | 0        |
| 2279 | hsa-miR-31-5p    | 25      | 29     | 5,31    | 6,06   | 5,71         | -0,75  | 1,30 | 0,19762 | 0,582     | 0        |
| 456  | hsa-miR-130b-3p  | 23      | 21     | 8,29    | 8,72   | 8,50         | -0,43  | 1,30 | 0,20023 | 0,585     | 0        |
| 518  | hsa-miR-215-5p   | 25      | 26     | 7,50    | 6,73   | 7,11         | 0,77   | 1,29 | 0,20144 | 0,585     | 0        |
| 2254 | hsa-miR-151a-3p  | 28      | 26     | 4,82    | 5,75   | 5,27         | -0,92  | 1,29 | 0,20351 | 0,587     | 0        |
| 2116 | hsa-miR-361-3p   | 12      | 10     | 7,96    | 10,26  | 9,00         | -2,30  | 1,29 | 0,20765 | 0,587     | 0        |
| 2343 | hsa-miR-92b-5p   | 9       | 7      | 9,66    | 8,81   | 9,28         | 0,85   | 1,31 | 0,20775 | 0,587     | 0        |
| 387  | hsa-miR-10a-5p   | 25      | 26     | 6,49    | 7,03   | 6,76         | -0,54  | 1,27 | 0,20836 | 0,587     | 0        |
| 2309 | hsa-miR-424-3p   | 12      | 8      | 9,44    | 10,37  | 9,81         | -0,93  | 1,29 | 0,21089 | 0,587     | 0        |
| 2422 | hsa-miR-18a-5p   | 18      | 17     | 9,28    | 9,94   | 9,60         | -0,67  | 1,27 | 0,21105 | 0,587     | 0        |

| ID       | NAME                  | #N<br>R | #<br>R | NR_MEAN | R_MEAN | AVE_EXP<br>R | LOG2FC | T         | P           | ADJ_P(BH) | SELECTED |
|----------|-----------------------|---------|--------|---------|--------|--------------|--------|-----------|-------------|-----------|----------|
| 420      | hsa-miR-30d-5p        | 26      | 27     | 5,02    | 5,62   | 5,32         | -0,59  | -<br>1,25 | 0,2174<br>0 | 0,596     | 0        |
| 113<br>8 | hsa-miR-379-5p        | 25      | 22     | 8,98    | 9,59   | 9,26         | -0,61  | -<br>1,25 | 0,2174<br>8 | 0,596     | 0        |
| 200<br>5 | hsa-miR-675-5p        | 13      | 10     | 8,68    | 6,45   | 7,71         | 2,23   | 1,25      | 0,2235<br>4 | 0,609     | 0        |
| 231<br>7 | hsa-miR-181a-2-<br>3p | 20      | 18     | 9,00    | 9,48   | 9,23         | -0,48  | -<br>1,23 | 0,2262<br>4 | 0,612     | 0        |
| 224<br>4 | hsa-miR-455-3p        | 18      | 14     | 8,21    | 8,76   | 8,45         | -0,55  | -<br>1,22 | 0,2299<br>3 | 0,617     | 0        |
| 587      | hsa-miR-29c-3p        | 27      | 28     | 6,09    | 6,79   | 6,45         | -0,70  | 1,21      | 0,2320<br>9 | 0,618     | 0        |
| 224<br>6 | hsa-miR-133a-3p       | 26      | 24     | 7,69    | 8,59   | 8,12         | -0,89  | -<br>1,21 | 0,2333<br>1 | 0,618     | 0        |
| 213<br>9 | hsa-miR-93-3p         | 25      | 27     | 5,47    | 5,82   | 5,65         | -0,35  | 1,20      | 0,2359<br>7 | 0,621     | 0        |
| 208<br>7 | hsa-miR-505-5p        | 19      | 19     | 9,48    | 9,94   | 9,71         | -0,46  | -<br>1,19 | 0,2412<br>5 | 0,628     | 0        |
| 524      | hsa-miR-221-3p        | 24      | 21     | 6,50    | 7,05   | 6,76         | -0,55  | -<br>1,18 | 0,2441<br>2 | 0,628     | 0        |
| 508      | hsa-miR-204-5p        | 23      | 19     | 9,10    | 8,57   | 8,86         | 0,53   | 1,17      | 0,2472<br>5 | 0,628     | 0        |
| 546      | hsa-miR-335-5p        | 25      | 22     | 8,53    | 9,31   | 8,90         | -0,78  | -<br>1,17 | 0,2485<br>7 | 0,628     | 0        |
| 198<br>6 | hsa-miR-766-3p        | 22      | 24     | 6,91    | 7,33   | 7,13         | -0,42  | -<br>1,17 | 0,2486<br>3 | 0,628     | 0        |
| 227<br>6 | hsa-miR-222-3p        | 29      | 29     | 1,03    | 1,52   | 1,27         | -0,49  | -<br>1,16 | 0,2490<br>5 | 0,628     | 0        |
| 436      | hsa-miR-99b-5p        | 26      | 27     | 5,17    | 5,65   | 5,41         | -0,49  | 1,16      | 0,2501<br>1 | 0,628     | 0        |
| 529      | hsa-miR-302a-3p       | 19      | 17     | 6,76    | 7,63   | 7,17         | -0,87  | -<br>1,15 | 0,2560<br>9 | 0,639     | 0        |
| 199<br>8 | hsa-miR-769-5p        | 25      | 18     | 8,06    | 8,65   | 8,31         | -0,60  | -<br>1,13 | 0,2645<br>7 | 0,653     | 0        |
| 220<br>3 | hsa-miR-875-5p        | 17      | 10     | 8,73    | 10,72  | 9,46         | -1,99  | -<br>1,13 | 0,2685<br>7 | 0,653     | 0        |
| 218<br>7 | hsa-miR-942-5p        | 17      | 15     | 11,34   | 10,89  | 11,13        | 0,45   | 1,12      | 0,2704<br>6 | 0,653     | 0        |
| 151<br>2 | hsa-miR-657           | 8       | 8      | 6,61    | 9,71   | 8,16         | -3,10  | -<br>1,14 | 0,2705<br>7 | 0,653     | 0        |
| 227<br>4 | hsa-miR-200b-5p       | 14      | 13     | 11,15   | 10,37  | 10,77        | 0,78   | 1,12      | 0,2706<br>8 | 0,653     | 0        |
| 437      | hsa-miR-100-5p        | 25      | 27     | 4,87    | 5,34   | 5,11         | -0,46  | -<br>1,11 | 0,2720<br>1 | 0,653     | 0        |
| 236<br>1 | hsa-miR-146b-3p       | 14      | 10     | 10,10   | 9,24   | 9,74         | 0,86   | 1,12      | 0,2731<br>5 | 0,653     | 0        |
| 527      | hsa-miR-296-5p        | 18      | 14     | 10,89   | 10,21  | 10,59        | 0,68   | 1,11      | 0,2760<br>7 | 0,656     | 0        |
| 510      | hsa-miR-206           | 8       | 8      | 7,41    | 9,61   | 8,51         | -2,20  | -<br>1,11 | 0,2798<br>8 | 0,657     | 0        |
| 159<br>4 | hsa-miR-643           | 7       | 10     | 9,45    | 10,74  | 10,21        | -1,29  | -<br>1,11 | 0,2799<br>6 | 0,657     | 0        |
| 242<br>5 | hsa-miR-19b-1-5p      | 15      | 10     | 10,02   | 10,49  | 10,21        | -0,47  | 1,09      | 0,2831<br>3 | 0,661     | 0        |
| 222<br>8 | hsa-miR-126-3p        | 29      | 29     | -0,70   | -0,36  | -0,53        | -0,34  | -<br>1,07 | 0,2874<br>0 | 0,666     | 0        |
| 219<br>8 | hsa-miR-125a-5p       | 26      | 27     | 5,19    | 5,57   | 5,38         | -0,39  | 1,07      | 0,2886<br>4 | 0,666     | 0        |
| 420      | hsa-miR-30d-5p        | 26      | 26     | 4,64    | 5,18   | 4,91         | -0,54  | -<br>1,06 | 0,2953<br>8 | 0,677     | 0        |
| 244<br>4 | hsa-miR-26b-3p        | 20      | 22     | 9,36    | 10,50  | 9,96         | -1,14  | -<br>1,05 | 0,2977<br>8 | 0,679     | 0        |
| 109<br>7 | hsa-miR-146b-5p       | 27      | 29     | 2,01    | 2,35   | 2,19         | -0,34  | -<br>1,05 | 0,3000<br>1 | 0,680     | 0        |
| 485      | hsa-miR-184           | 21      | 19     | 9,34    | 8,72   | 9,05         | 0,62   | 1,04      | 0,3030<br>2 | 0,683     | 0        |
| 565      | hsa-miR-376a-3p       | 25      | 18     | 9,73    | 10,07  | 9,87         | -0,35  | -<br>1,03 | 0,3091<br>3 | 0,690     | 0        |
| 211<br>6 | hsa-miR-361-3p        | 14      | 7      | 9,92    | 10,68  | 10,18        | -0,76  | -<br>1,04 | 0,3096<br>2 | 0,690     | 0        |
| 102<br>0 | hsa-miR-365b-3p       | 26      | 28     | 5,98    | 6,48   | 6,24         | -0,50  | -<br>1,01 | 0,3146<br>7 | 0,691     | 0        |

| ID  | NAME              | #N<br>R | #<br>R | NR_MEAN | R_MEAN | AVE_EXP<br>R | LOG2FC | T    | P           | ADJ_P(BH) | SELECTED |
|-----|-------------------|---------|--------|---------|--------|--------------|--------|------|-------------|-----------|----------|
| 592 | hsa-miR-136-5p    | 17      | 9      | 10,43   | 11,34  | 10,75        | -0,91  | 1,02 | 0,3152<br>2 | 0,691     | 0        |
| 218 | hsa-miR-941       | 11      | 14     | 9,93    | 10,48  | 10,24        | -0,55  | 1,02 | 0,3156<br>3 | 0,691     | 0        |
| 127 | hsa-miR-363-3p    | 10      | 7      | 10,59   | 11,27  | 10,87        | -0,68  | 1,01 | 0,3253<br>6 | 0,709     | 0        |
| 154 | hsa-miR-589-3p    | 11      | 9      | 7,97    | 10,66  | 9,18         | -2,69  | 0,99 | 0,3306<br>5 | 0,715     | 0        |
| 236 | hsa-miR-193b-5p   | 16      | 9      | 9,58    | 9,03   | 9,39         | 0,55   | 0,99 | 0,3318<br>3 | 0,715     | 0        |
| 243 | hsa-miR-628-3p    | 18      | 13     | 11,45   | 10,82  | 11,19        | 0,63   | 0,96 | 0,3416<br>2 | 0,724     | 0        |
| 226 | hsa-miR-342-3p    | 28      | 28     | 1,92    | 1,53   | 1,73         | 0,38   | 0,96 | 0,3418<br>3 | 0,724     | 0        |
| 128 | hsa-miR-455-5p    | 25      | 18     | 8,21    | 8,56   | 8,36         | -0,35  | 0,96 | 0,3429<br>7 | 0,724     | 0        |
| 155 | hsa-miR-622       | 19      | 21     | 9,40    | 10,11  | 9,77         | -0,71  | 0,96 | 0,3441<br>2 | 0,724     | 0        |
| 215 | hsa-miR-125b-2-3p | 14      | 9      | 10,30   | 11,06  | 10,60        | -0,76  | 0,95 | 0,3488<br>4 | 0,724     | 0        |
| 567 | hsa-miR-378a-5p   | 12      | 11     | 11,06   | 10,55  | 10,82        | 0,51   | 0,95 | 0,3497<br>5 | 0,724     | 0        |
| 127 | hsa-miR-410-3p    | 21      | 18     | 10,15   | 10,56  | 10,34        | -0,41  | 0,94 | 0,3509<br>6 | 0,724     | 0        |
| 235 | hsa-miR-576-3p    | 12      | 9      | 9,58    | 11,01  | 10,19        | -1,42  | 0,95 | 0,3536<br>0 | 0,724     | 0        |
| 102 | hsa-miR-432-5p    | 15      | 11     | 8,67    | 9,57   | 9,05         | -0,89  | 0,94 | 0,3554<br>5 | 0,724     | 0        |
| 228 | hsa-miR-139-5p    | 26      | 27     | 7,60    | 7,24   | 7,42         | 0,36   | 0,93 | 0,3564<br>6 | 0,724     | 0        |
| 471 | hsa-miR-148b-3p   | 20      | 16     | 9,34    | 9,81   | 9,55         | -0,47  | 0,92 | 0,3613<br>5 | 0,724     | 0        |
| 225 | hsa-miR-200b-3p   | 26      | 28     | 2,77    | 3,14   | 2,96         | -0,37  | 0,92 | 0,3619<br>0 | 0,724     | 0        |
| 236 | hsa-miR-494-3p    | 28      | 29     | 4,27    | 4,75   | 4,51         | -0,48  | 0,92 | 0,3623<br>9 | 0,724     | 0        |
| 111 | hsa-miR-520b      | 13      | 9      | 9,35    | 10,16  | 9,68         | -0,81  | 0,93 | 0,3637<br>3 | 0,724     | 0        |
| 233 | hsa-miR-182-5p    | 26      | 27     | 7,73    | 8,11   | 7,92         | -0,37  | 0,92 | 0,3639<br>1 | 0,724     | 0        |
| 228 | hsa-miR-138-5p    | 22      | 19     | 8,65    | 9,11   | 8,86         | -0,46  | 0,91 | 0,3664<br>4 | 0,725     | 0        |
| 230 | hsa-miR-214-3p    | 25      | 28     | 3,09    | 3,49   | 3,30         | -0,39  | 0,91 | 0,3692<br>6 | 0,727     | 0        |
| 159 | hsa-miR-618       | 23      | 19     | 10,19   | 10,60  | 10,38        | -0,41  | 0,90 | 0,3723<br>4 | 0,729     | 0        |
| 127 | hsa-miR-487a-3p   | 23      | 21     | 8,25    | 8,66   | 8,45         | -0,41  | 0,90 | 0,3746<br>6 | 0,729     | 0        |
| 533 | hsa-miR-302c-3p   | 26      | 24     | 4,48    | 5,36   | 4,90         | -0,88  | 0,89 | 0,3768<br>4 | 0,729     | 0        |
| 216 | hsa-miR-148b-5p   | 12      | 16     | 10,49   | 10,94  | 10,75        | -0,45  | 0,90 | 0,3776<br>6 | 0,729     | 0        |
| 200 | hsa-miR-768-3p    | 9       | 7      | 11,18   | 10,26  | 10,78        | 0,92   | 0,90 | 0,3793<br>3 | 0,729     | 0        |
| 222 | hsa-miR-1         | 12      | 7      | 8,94    | 10,04  | 9,34         | -1,10  | 0,88 | 0,3864<br>7 | 0,736     | 0        |
| 225 | hsa-miR-101-3p    | 21      | 16     | 9,94    | 9,57   | 9,78         | 0,37   | 0,87 | 0,3883<br>6 | 0,736     | 0        |
| 223 | hsa-miR-135a-3p   | 7       | 11     | 11,07   | 10,27  | 10,58        | 0,80   | 0,88 | 0,3889<br>6 | 0,736     | 0        |
| 225 | hsa-miR-149-5p    | 26      | 28     | 5,11    | 5,57   | 5,35         | -0,46  | 0,86 | 0,3920<br>7 | 0,736     | 0        |
| 102 | hsa-miR-432-5p    | 12      | 13     | 9,29    | 9,77   | 9,54         | -0,48  | 0,87 | 0,3923<br>6 | 0,736     | 0        |
| 103 | hsa-miR-490-3p    | 14      | 10     | 10,70   | 10,24  | 10,51        | 0,46   | 0,86 | 0,3960<br>4 | 0,737     | 0        |
| 500 | hsa-miR-199b-5p   | 14      | 9      | 9,59    | 10,10  | 9,79         | -0,50  | 0,86 | 0,3965<br>7 | 0,737     | 0        |
| 242 | hsa-miR-18a-3p    | 16      | 10     | 10,45   | 10,90  | 10,62        | -0,45  | 0,85 | 0,4013<br>5 | 0,741     | 0        |
| 229 | hsa-miR-885-5p    | 23      | 21     | 8,44    | 7,46   | 7,97         | 0,98   | 0,84 | 0,4030<br>7 | 0,741     | 0        |

| ID   | NAME             | #N<br>R | #<br>R | NR_MEAN | R_MEAN | AVE_EXP<br>R | LOG2FC | T    | P       | ADJ_P(BH) | SELECTED |
|------|------------------|---------|--------|---------|--------|--------------|--------|------|---------|-----------|----------|
| 2216 | hsa-miR-128-3p   | 16      | 14     | 9,47    | 9,93   | 9,69         | -0,46  | 0,84 | 0,40478 | 0,741     | 0        |
| 2315 | hsa-miR-10b-3p   | 23      | 25     | 7,98    | 8,33   | 8,17         | -0,35  | 0,84 | 0,40625 | 0,741     | 0        |
| 2273 | hsa-miR-198      | 11      | 9      | 9,03    | 8,56   | 8,82         | 0,47   | 0,84 | 0,40975 | 0,744     | 0        |
| 2247 | hsa-miR-133b     | 23      | 23     | 4,39    | 3,75   | 4,07         | 0,63   | 0,82 | 0,41453 | 0,747     | 0        |
| 2364 | hsa-miR-493-3p   | 15      | 12     | 11,24   | 10,64  | 10,97        | 0,59   | 0,82 | 0,41644 | 0,747     | 0        |
| 2091 | hsa-miR-513a-3p  | 18      | 15     | 9,60    | 8,60   | 9,14         | 1,00   | 0,82 | 0,42012 | 0,747     | 0        |
| 523  | hsa-miR-220      | 24      | 22     | 8,68    | 8,15   | 8,43         | 0,53   | 0,80 | 0,42491 | 0,747     | 0        |
| 2214 | hsa-miR-892b     | 7       | 8      | 11,24   | 10,09  | 10,63        | 1,14   | 0,81 | 0,42666 | 0,747     | 0        |
| 2447 | hsa-miR-29a-5p   | 11      | 8      | 11,10   | 11,61  | 11,32        | -0,51  | 0,81 | 0,42697 | 0,747     | 0        |
| 2408 | hsa-miR-548b-5p  | 11      | 7      | 11,73   | 11,04  | 11,46        | 0,69   | 0,81 | 0,42729 | 0,747     | 0        |
| 2184 | hsa-miR-339-3p   | 28      | 28     | 5,97    | 6,32   | 6,15         | -0,35  | 0,80 | 0,42755 | 0,747     | 0        |
| 2263 | hsa-miR-190b     | 21      | 22     | 8,14    | 8,86   | 8,51         | -0,71  | 0,80 | 0,42883 | 0,747     | 0        |
| 1551 | hsa-miR-597-5p   | 11      | 10     | 12,37   | 11,83  | 12,12        | 0,54   | 0,79 | 0,43527 | 0,755     | 0        |
| 1818 | hsa-miR-29c-5p   | 22      | 22     | 9,57    | 9,28   | 9,43         | 0,29   | 0,76 | 0,45243 | 0,776     | 0        |
| 413  | hsa-miR-29b-3p   | 22      | 19     | 9,29    | 8,36   | 8,86         | 0,93   | 0,75 | 0,45517 | 0,776     | 0        |
| 2374 | hsa-miR-887-3p   | 8       | 12     | 8,16    | 9,16   | 8,76         | -1,00  | 0,75 | 0,45954 | 0,776     | 0        |
| 2271 | hsa-miR-185-5p   | 25      | 22     | 7,95    | 8,20   | 8,07         | -0,25  | 0,75 | 0,45966 | 0,776     | 0        |
| 2432 | hsa-miR-625-3p   | 25      | 26     | 8,30    | 7,93   | 8,11         | 0,37   | 0,74 | 0,45996 | 0,776     | 0        |
| 2021 | hsa-miR-674      | 13      | 15     | 6,40    | 6,96   | 6,70         | -0,56  | 0,74 | 0,46307 | 0,776     | 0        |
| 498  | hsa-miR-199a-5p  | 16      | 12     | 9,71    | 10,12  | 9,89         | -0,41  | 0,74 | 0,46323 | 0,776     | 0        |
| 1186 | hsa-miR-134-5p   | 25      | 26     | 7,48    | 7,76   | 7,62         | -0,28  | 0,74 | 0,46340 | 0,776     | 0        |
| 543  | hsa-miR-328-3p   | 24      | 22     | 8,58    | 8,84   | 8,71         | -0,26  | 0,73 | 0,47005 | 0,784     | 0        |
| 2267 | hsa-miR-545-3p   | 13      | 6      | 11,08   | 10,35  | 10,85        | 0,73   | 0,73 | 0,47567 | 0,790     | 0        |
| 2098 | hsa-miR-223-5p   | 16      | 13     | 9,92    | 9,38   | 9,68         | 0,54   | 0,72 | 0,47902 | 0,790     | 0        |
| 2097 | hsa-miR-222-5p   | 20      | 18     | 8,94    | 9,44   | 9,18         | -0,50  | 0,71 | 0,48001 | 0,790     | 0        |
| 470  | hsa-miR-148a-3p  | 24      | 24     | 7,04    | 7,34   | 7,19         | -0,30  | 0,71 | 0,48136 | 0,790     | 0        |
| 1614 | hsa-miR-572      | 20      | 17     | 10,64   | 10,07  | 10,38        | 0,57   | 0,70 | 0,48911 | 0,799     | 0        |
| 1986 | hsa-miR-766-3p   | 21      | 19     | 6,85    | 7,17   | 7,00         | -0,32  | 0,69 | 0,49702 | 0,808     | 0        |
| 564  | hsa-miR-375      | 25      | 27     | 6,40    | 5,96   | 6,17         | 0,44   | 0,68 | 0,50129 | 0,811     | 0        |
| 1184 | hsa-miR-129-2-3p | 7       | 9      | 9,65    | 10,19  | 9,95         | -0,54  | 0,68 | 0,50261 | 0,811     | 0        |
| 1156 | hsa-miR-518b     | 22      | 24     | 9,11    | 8,45   | 8,76         | 0,66   | 0,67 | 0,50779 | 0,812     | 0        |
| 2240 | hsa-miR-542-5p   | 23      | 26     | 6,35    | 5,52   | 5,91         | 0,84   | 0,67 | 0,50784 | 0,812     | 0        |
| 2237 | hsa-miR-548d-5p  | 12      | 4      | 7,93    | 10,72  | 8,63         | -2,78  | 0,67 | 0,50964 | 0,812     | 0        |
| 2149 | hsa-miR-145-3p   | 20      | 18     | 9,92    | 10,29  | 10,10        | -0,37  | 0,66 | 0,51459 | 0,813     | 0        |
| 1109 | hsa-miR-502-5p   | 16      | 8      | 10,79   | 10,45  | 10,67        | 0,34   | 0,66 | 0,51494 | 0,813     | 0        |
| 2445 | hsa-miR-27a-5p   | 24      | 21     | 8,85    | 9,10   | 8,97         | -0,25  | 0,65 | 0,51636 | 0,813     | 0        |

| ID   | NAME              | #N<br>R | #<br>R | NR_MEAN | R_MEAN | AVE_EXP<br>R | LOG2FC | T    | P       | ADJ_P(BH) | SELECTED |
|------|-------------------|---------|--------|---------|--------|--------------|--------|------|---------|-----------|----------|
| 1121 | hsa-miR-520g-3p   | 10      | 5      | 10,61   | 10,15  | 10,46        | 0,47   | 0,66 | 0,51853 | 0,813     | 0        |
| 553  | hsa-miR-346       | 10      | 5      | 9,85    | 10,61  | 10,11        | -0,76  | 0,66 | 0,52058 | 0,813     | 0        |
| 2316 | hsa-miR-34a-3p    | 23      | 24     | 9,14    | 8,89   | 9,01         | 0,25   | 0,64 | 0,52425 | 0,816     | 0        |
| 2002 | hsa-miR-770-5p    | 6       | 11     | 8,98    | 9,81   | 9,52         | -0,83  | 0,64 | 0,52800 | 0,818     | 0        |
| 1621 | hsa-miR-580-3p    | 13      | 8      | 10,23   | 9,74   | 10,04        | 0,50   | 0,63 | 0,53802 | 0,824     | 0        |
| 1613 | hsa-miR-571       | 24      | 21     | 8,99    | 8,39   | 8,71         | 0,60   | 0,61 | 0,54306 | 0,824     | 0        |
| 2277 | hsa-miR-320a      | 27      | 28     | 2,10    | 2,35   | 2,23         | -0,25  | 0,61 | 0,54411 | 0,824     | 0        |
| 1630 | hsa-miR-491-5p    | 25      | 22     | 7,81    | 8,01   | 7,91         | -0,20  | 0,61 | 0,54774 | 0,824     | 0        |
| 2186 | hsa-miR-345-5p    | 27      | 29     | 4,91    | 5,13   | 5,03         | -0,22  | 0,60 | 0,54858 | 0,824     | 0        |
| 2378 | hsa-miR-125b-1-3p | 12      | 10     | 10,59   | 10,20  | 10,41        | 0,39   | 0,61 | 0,54984 | 0,824     | 0        |
| 1550 | hsa-miR-596       | 25      | 23     | 5,11    | 5,53   | 5,31         | -0,42  | 0,60 | 0,54989 | 0,824     | 0        |
| 2427 | hsa-miR-499a-3p   | 13      | 11     | 8,27    | 7,70   | 8,01         | 0,57   | 0,60 | 0,55228 | 0,824     | 0        |
| 1039 | hsa-miR-492       | 10      | 12     | 9,92    | 9,55   | 9,72         | 0,38   | 0,60 | 0,55436 | 0,824     | 0        |
| 1606 | hsa-miR-661       | 20      | 18     | 8,37    | 7,97   | 8,18         | 0,40   | 0,60 | 0,55450 | 0,824     | 0        |
| 1193 | hsa-miR-187-3p    | 16      | 17     | 7,20    | 7,96   | 7,59         | -0,76  | 0,60 | 0,55472 | 0,824     | 0        |
| 2421 | hsa-miR-17-3p     | 11      | 9      | 10,14   | 10,45  | 10,28        | -0,32  | 0,59 | 0,56077 | 0,830     | 0        |
| 2196 | hsa-miR-99b-3p    | 23      | 24     | 8,54    | 8,32   | 8,43         | 0,22   | 0,58 | 0,56438 | 0,832     | 0        |
| 489  | hsa-miR-190a-5p   | 12      | 8      | 10,77   | 10,47  | 10,65        | 0,29   | 0,58 | 0,57048 | 0,837     | 0        |
| 1998 | hsa-miR-769-5p    | 22      | 23     | 8,20    | 8,44   | 8,32         | -0,24  | 0,57 | 0,57223 | 0,837     | 0        |
| 186  | hsa-miR-96-5p     | 13      | 9      | 10,36   | 10,76  | 10,52        | -0,40  | 0,57 | 0,57706 | 0,837     | 0        |
| 2295 | hsa-miR-223-3p    | 26      | 29     | 2,10    | 2,34   | 2,23         | -0,24  | 0,56 | 0,57888 | 0,837     | 0        |
| 382  | hsa-let-7f-5p     | 26      | 19     | 7,11    | 7,31   | 7,19         | -0,21  | 0,55 | 0,58181 | 0,837     | 0        |
| 2193 | hsa-miR-886-5p    | 28      | 29     | 3,83    | 4,11   | 3,97         | -0,28  | 0,55 | 0,58479 | 0,837     | 0        |
| 2322 | hsa-miR-671-3p    | 14      | 11     | 9,51    | 9,82   | 9,65         | -0,31  | 0,55 | 0,58615 | 0,837     | 0        |
| 2320 | hsa-miR-188-5p    | 20      | 18     | 8,85    | 9,35   | 9,08         | -0,50  | 0,55 | 0,58692 | 0,837     | 0        |
| 2199 | hsa-miR-125a-3p   | 21      | 21     | 10,11   | 9,83   | 9,97         | 0,28   | 0,55 | 0,58712 | 0,837     | 0        |
| 1558 | hsa-miR-601       | 15      | 12     | 11,11   | 10,60  | 10,89        | 0,51   | 0,54 | 0,59398 | 0,843     | 0        |
| 1979 | hsa-miR-431-5p    | 21      | 16     | 8,77    | 8,29   | 8,56         | 0,49   | 0,54 | 0,59554 | 0,843     | 0        |
| 1621 | hsa-miR-580-3p    | 14      | 10     | 9,36    | 10,00  | 9,63         | -0,64  | 0,53 | 0,59786 | 0,843     | 0        |
| 2414 | hsa-miR-616-3p    | 8       | 9      | 10,35   | 10,68  | 10,52        | -0,33  | 0,52 | 0,61003 | 0,853     | 0        |
| 2259 | hsa-miR-340-3p    | 20      | 17     | 9,79    | 9,98   | 9,88         | -0,18  | 0,51 | 0,61124 | 0,853     | 0        |
| 1592 | hsa-miR-642a-5p   | 16      | 15     | 10,29   | 10,52  | 10,40        | -0,23  | 0,51 | 0,61127 | 0,853     | 0        |
| 2355 | hsa-miR-532-3p    | 25      | 25     | 7,23    | 6,75   | 6,99         | 0,48   | 0,51 | 0,61390 | 0,853     | 0        |
| 2388 | hsa-miR-518f-3p   | 22      | 18     | 8,83    | 9,17   | 8,98         | -0,34  | 0,50 | 0,61897 | 0,857     | 0        |
| 1614 | hsa-miR-572       | 16      | 17     | 10,29   | 9,94   | 10,11        | 0,35   | 0,49 | 0,62750 | 0,866     | 0        |
| 2236 | hsa-miR-509-3p    | 24      | 22     | 10,28   | 9,98   | 10,14        | 0,30   | 0,48 | 0,63034 | 0,866     | 0        |



| ID   | NAME             | #N<br>R | #<br>R | NR_MEAN | R_MEAN | AVE_EXP<br>R | LOG2FC | T    | P       | ADJ_P(BH) | SELECTED |
|------|------------------|---------|--------|---------|--------|--------------|--------|------|---------|-----------|----------|
| 2083 | hsa-miR-502-3p   | 14      | 12     | 10,09   | 10,33  | 10,20        | -0,24  | 0,48 | 0,63192 | 0,866     | 0        |
| 2156 | hsa-miR-337-5p   | 16      | 10     | 10,28   | 10,02  | 10,18        | 0,26   | 0,48 | 0,63513 | 0,867     | 0        |
| 1823 | hsa-miR-512-3p   | 17      | 9      | 10,21   | 9,90   | 10,10        | 0,31   | 0,48 | 0,63725 | 0,867     | 0        |
| 416  | hsa-miR-30a-3p   | 26      | 26     | 4,72    | 4,98   | 4,85         | -0,26  | 0,46 | 0,64472 | 0,875     | 0        |
| 2141 | hsa-miR-99a-3p   | 24      | 26     | 9,41    | 9,22   | 9,31         | 0,19   | 0,45 | 0,65548 | 0,880     | 0        |
| 2324 | hsa-miR-744-5p   | 26      | 26     | 6,56    | 6,73   | 6,65         | -0,17  | 0,45 | 0,65617 | 0,880     | 0        |
| 1567 | hsa-miR-604      | 7       | 10     | 10,88   | 11,32  | 11,14        | -0,43  | 0,45 | 0,65686 | 0,880     | 0        |
| 2227 | hsa-miR-323a-3p  | 23      | 17     | 9,34    | 9,57   | 9,44         | -0,23  | 0,44 | 0,65919 | 0,880     | 0        |
| 454  | hsa-miR-130a-3p  | 26      | 26     | 7,45    | 7,80   | 7,62         | -0,35  | 0,44 | 0,66024 | 0,880     | 0        |
| 2333 | hsa-miR-181c-3p  | 12      | 8      | 9,70    | 9,92   | 9,79         | -0,22  | 0,44 | 0,66694 | 0,885     | 0        |
| 2208 | hsa-miR-450b-3p  | 26      | 25     | 3,87    | 4,10   | 3,99         | -0,23  | 0,43 | 0,67126 | 0,885     | 0        |
| 2136 | hsa-miR-33a-3p   | 10      | 12     | 10,18   | 10,39  | 10,29        | -0,21  | 0,43 | 0,67230 | 0,885     | 0        |
| 399  | hsa-miR-23a-3p   | 24      | 20     | 7,42    | 7,90   | 7,64         | -0,48  | 0,43 | 0,67261 | 0,885     | 0        |
| 2270 | hsa-miR-183-3p   | 22      | 22     | 7,93    | 8,09   | 8,01         | -0,16  | 0,41 | 0,68048 | 0,892     | 0        |
| 2386 | hsa-miR-523-3p   | 20      | 13     | 9,88    | 10,34  | 10,06        | -0,46  | 0,41 | 0,68622 | 0,892     | 0        |
| 1550 | hsa-miR-596      | 25      | 23     | 5,36    | 5,63   | 5,49         | -0,28  | 0,41 | 0,68639 | 0,892     | 0        |
| 1030 | hsa-miR-449a     | 22      | 24     | 8,22    | 8,53   | 8,38         | -0,31  | 0,40 | 0,68739 | 0,892     | 0        |
| 1286 | hsa-miR-539-5p   | 25      | 24     | 8,53    | 8,73   | 8,63         | -0,20  | 0,40 | 0,69037 | 0,893     | 0        |
| 1613 | hsa-miR-571      | 24      | 21     | 9,09    | 9,43   | 9,25         | -0,34  | 0,40 | 0,69223 | 0,893     | 0        |
| 1544 | hsa-miR-550a-3p  | 23      | 17     | 9,94    | 9,77   | 9,87         | 0,17   | 0,39 | 0,69816 | 0,895     | 0        |
| 2443 | hsa-miR-26a-1-3p | 16      | 19     | 10,63   | 10,80  | 10,72        | -0,17  | 0,39 | 0,70127 | 0,895     | 0        |
| 1141 | hsa-miR-451a     | 25      | 22     | 8,08    | 7,88   | 7,98         | 0,20   | 0,39 | 0,70159 | 0,895     | 0        |
| 2402 | hsa-miR-517b-3p  | 19      | 11     | 9,64    | 9,39   | 9,55         | 0,25   | 0,38 | 0,70561 | 0,895     | 0        |
| 1553 | hsa-miR-622      | 20      | 22     | 9,77    | 9,58   | 9,67         | 0,19   | 0,38 | 0,70878 | 0,895     | 0        |
| 604  | hsa-miR-424-5p   | 13      | 6      | 10,51   | 10,76  | 10,59        | -0,25  | 0,38 | 0,70890 | 0,895     | 0        |
| 2233 | hsa-miR-331-5p   | 20      | 17     | 10,01   | 9,84   | 9,93         | 0,16   | 0,37 | 0,71278 | 0,895     | 0        |
| 1120 | hsa-miR-520f-3p  | 14      | 8      | 10,10   | 10,51  | 10,25        | -0,41  | 0,37 | 0,71328 | 0,895     | 0        |
| 2114 | hsa-miR-130b-5p  | 11      | 4      | 9,90    | 10,16  | 9,97         | -0,26  | 0,37 | 0,71466 | 0,895     | 0        |
| 2346 | hsa-miR-551b-5p  | 7       | 8      | 11,35   | 11,02  | 11,18        | 0,33   | 0,37 | 0,71705 | 0,895     | 0        |
| 1546 | hsa-miR-592      | 16      | 9      | 10,92   | 10,68  | 10,83        | 0,24   | 0,36 | 0,71919 | 0,895     | 0        |
| 2305 | hsa-miR-30d-3p   | 18      | 18     | 10,21   | 10,08  | 10,15        | 0,12   | 0,32 | 0,74986 | 0,930     | 0        |
| 2269 | hsa-miR-183-5p   | 24      | 21     | 8,66    | 8,79   | 8,72         | -0,13  | 0,31 | 0,75744 | 0,932     | 0        |
| 2434 | hsa-miR-628-3p   | 15      | 17     | 10,88   | 10,72  | 10,79        | 0,17   | 0,31 | 0,76192 | 0,932     | 0        |
| 1512 | hsa-miR-657      | 7       | 9      | 10,06   | 9,67   | 9,84         | 0,39   | 0,31 | 0,76259 | 0,932     | 0        |
| 2415 | hsa-miR-519a-3p  | 19      | 15     | 9,47    | 9,63   | 9,54         | -0,16  | 0,30 | 0,76322 | 0,932     | 0        |
| 1562 | hsa-miR-629-3p   | 23      | 18     | 10,26   | 10,40  | 10,32        | -0,15  | 0,30 | 0,76355 | 0,932     | 0        |

| ID   | NAME             | #N<br>R | #<br>R | NR_MEAN | R_MEAN | AVE_EXP<br>R | LOG2FC | T    | P       | ADJ_P(BH) | SELECTED |
|------|------------------|---------|--------|---------|--------|--------------|--------|------|---------|-----------|----------|
| 2436 | hsa-miR-629-5p   | 9       | 9      | 11,00   | 10,78  | 10,89        | 0,22   | 0,30 | 0,76886 | 0,933     | 0        |
| 2182 | hsa-miR-939-5p   | 25      | 23     | 5,52    | 5,74   | 5,63         | -0,22  | 0,30 | 0,76905 | 0,933     | 0        |
| 2420 | hsa-miR-16-1-3p  | 10      | 12     | 11,26   | 11,03  | 11,13        | 0,24   | 0,29 | 0,77254 | 0,933     | 0        |
| 1119 | hsa-miR-520e     | 9       | 9      | 10,39   | 9,94   | 10,16        | 0,45   | 0,29 | 0,77326 | 0,933     | 0        |
| 1821 | hsa-miR-484      | 28      | 28     | 2,14    | 2,24   | 2,19         | -0,10  | 0,28 | 0,77783 | 0,935     | 0        |
| 1011 | hsa-miR-200a-5p  | 21      | 21     | 9,47    | 9,59   | 9,53         | -0,12  | 0,28 | 0,78415 | 0,937     | 0        |
| 544  | hsa-miR-330-3p   | 21      | 25     | 8,80    | 9,08   | 8,95         | -0,28  | 0,27 | 0,78492 | 0,937     | 0        |
| 1043 | hsa-miR-497-5p   | 17      | 15     | 9,88    | 10,06  | 9,96         | -0,18  | 0,27 | 0,78678 | 0,937     | 0        |
| 1285 | hsa-miR-487b-3p  | 21      | 14     | 9,88    | 10,01  | 9,93         | -0,12  | 0,27 | 0,78841 | 0,937     | 0        |
| 2431 | hsa-miR-625-5p   | 24      | 23     | 9,46    | 9,35   | 9,41         | 0,11   | 0,26 | 0,79502 | 0,939     | 0        |
| 491  | hsa-miR-192-5p   | 26      | 23     | 8,16    | 8,02   | 8,10         | 0,14   | 0,26 | 0,79554 | 0,939     | 0        |
| 2340 | hsa-miR-423-5p   | 16      | 14     | 8,48    | 8,34   | 8,41         | 0,14   | 0,26 | 0,79955 | 0,941     | 0        |
| 400  | hsa-miR-23b-3p   | 24      | 22     | 8,68    | 8,81   | 8,74         | -0,13  | 0,25 | 0,80245 | 0,941     | 0        |
| 2118 | hsa-let-7g-3p    | 13      | 10     | 10,68   | 10,53  | 10,62        | 0,15   | 0,25 | 0,80801 | 0,941     | 0        |
| 2109 | hsa-miR-32-5p    | 19      | 15     | 10,50   | 10,60  | 10,54        | -0,10  | 0,24 | 0,80892 | 0,941     | 0        |
| 2257 | hsa-miR-339-5p   | 25      | 24     | 8,24    | 8,34   | 8,29         | -0,10  | 0,24 | 0,81286 | 0,941     | 0        |
| 2349 | hsa-miR-574-3p   | 27      | 28     | 3,20    | 3,11   | 3,15         | 0,09   | 0,24 | 0,81398 | 0,941     | 0        |
| 2264 | hsa-miR-872      | 11      | 13     | 11,83   | 11,99  | 11,92        | -0,17  | 0,24 | 0,81398 | 0,941     | 0        |
| 2250 | hsa-miR-193a-3p  | 27      | 26     | 9,75    | 9,86   | 9,80         | -0,11  | 0,21 | 0,83354 | 0,957     | 0        |
| 509  | hsa-miR-205-5p   | 25      | 26     | 5,87    | 5,77   | 5,82         | 0,10   | 0,21 | 0,83380 | 0,957     | 0        |
| 2299 | hsa-miR-191-5p   | 29      | 29     | -0,46   | -0,52  | -0,49        | 0,06   | 0,21 | 0,83676 | 0,957     | 0        |
| 1048 | hsa-miR-503-5p   | 11      | 7      | 10,20   | 10,31  | 10,24        | -0,11  | 0,21 | 0,83740 | 0,957     | 0        |
| 2367 | hsa-miR-193b-3p  | 28      | 28     | 2,20    | 2,28   | 2,24         | -0,07  | 0,20 | 0,84372 | 0,960     | 0        |
| 2005 | hsa-miR-675-5p   | 11      | 9      | 8,75    | 8,90   | 8,82         | -0,14  | 0,19 | 0,84889 | 0,960     | 0        |
| 2001 | hsa-miR-768-3p   | 11      | 7      | 10,30   | 10,59  | 10,41        | -0,29  | 0,19 | 0,85145 | 0,960     | 0        |
| 1159 | hsa-miR-518d-3p  | 15      | 11     | 9,51    | 9,38   | 9,46         | 0,13   | 0,19 | 0,85203 | 0,960     | 0        |
| 1028 | hsa-miR-433-3p   | 20      | 15     | 8,49    | 8,36   | 8,43         | 0,12   | 0,19 | 0,85237 | 0,960     | 0        |
| 2117 | hsa-miR-362-3p   | 12      | 9      | 10,85   | 10,75  | 10,81        | 0,10   | 0,18 | 0,85710 | 0,960     | 0        |
| 1533 | hsa-miR-566      | 15      | 9      | 10,08   | 10,25  | 10,15        | -0,17  | 0,18 | 0,85813 | 0,960     | 0        |
| 1278 | hsa-miR-486-5p   | 26      | 25     | 5,95    | 5,89   | 5,92         | 0,06   | 0,18 | 0,86153 | 0,960     | 0        |
| 2419 | hsa-miR-15a-3p   | 13      | 16     | 9,95    | 9,87   | 9,90         | 0,08   | 0,17 | 0,86554 | 0,960     | 0        |
| 2313 | hsa-miR-139-3p   | 5       | 13     | 8,23    | 8,39   | 8,34         | -0,15  | 0,17 | 0,86854 | 0,960     | 0        |
| 1990 | hsa-miR-758-3p   | 13      | 4      | 8,99    | 9,49   | 9,11         | -0,50  | 0,17 | 0,86890 | 0,960     | 0        |
| 2092 | hsa-miR-508-5p   | 17      | 18     | 8,77    | 8,69   | 8,73         | 0,08   | 0,17 | 0,86952 | 0,960     | 0        |
| 1603 | hsa-miR-650      | 23      | 22     | 6,95    | 7,04   | 7,00         | -0,09  | 0,16 | 0,87214 | 0,960     | 0        |
| 2429 | hsa-miR-548am-5p | 9       | 6      | 11,46   | 11,32  | 11,40        | 0,15   | 0,16 | 0,87510 | 0,960     | 0        |

| ID   | NAME            | #N<br>R | #<br>R | NR_MEAN | R_MEAN | AVE_EXP<br>R | LOG2FC | T    | P       | ADJ_P(BH<br>) | SELECTED |
|------|-----------------|---------|--------|---------|--------|--------------|--------|------|---------|---------------|----------|
| 572  | hsa-miR-382-5p  | 24      | 23     | 9,02    | 8,96   | 8,99         | 0,07   | 0,16 | 0,87703 | 0,960         | 0        |
| 2185 | hsa-miR-335-3p  | 21      | 20     | 10,07   | 9,99   | 10,03        | 0,08   | 0,15 | 0,87996 | 0,961         | 0        |
| 2325 | hsa-miR-744-3p  | 11      | 13     | 10,89   | 10,81  | 10,85        | 0,08   | 0,14 | 0,88684 | 0,964         | 0        |
| 2398 | hsa-miR-579-3p  | 11      | 6      | 10,81   | 10,72  | 10,78        | 0,09   | 0,14 | 0,88788 | 0,964         | 0        |
| 1533 | hsa-miR-566     | 11      | 8      | 9,80    | 9,69   | 9,75         | 0,12   | 0,14 | 0,89245 | 0,964         | 0        |
| 1603 | hsa-miR-650     | 24      | 23     | 7,08    | 7,00   | 7,04         | 0,08   | 0,14 | 0,89310 | 0,964         | 0        |
| 428  | hsa-miR-34c-5p  | 15      | 5      | 10,42   | 10,52  | 10,45        | -0,10  | 0,13 | 0,90041 | 0,968         | 0        |
| 2147 | hsa-miR-342-5p  | 23      | 19     | 9,50    | 9,57   | 9,53         | -0,06  | 0,12 | 0,90157 | 0,968         | 0        |
| 2297 | hsa-miR-422a    | 26      | 25     | 8,99    | 8,94   | 8,97         | 0,05   | 0,10 | 0,91717 | 0,979         | 0        |
| 422  | hsa-miR-30e-3p  | 24      | 26     | 5,83    | 5,78   | 5,80         | 0,05   | 0,10 | 0,92034 | 0,979         | 0        |
| 2234 | hsa-miR-140-3p  | 27      | 29     | 6,70    | 6,74   | 6,72         | -0,03  | 0,09 | 0,92550 | 0,979         | 0        |
| 2437 | hsa-miR-20a-3p  | 14      | 12     | 10,72   | 10,76  | 10,74        | -0,04  | 0,09 | 0,92668 | 0,979         | 0        |
| 2268 | hsa-miR-874-3p  | 10      | 10     | 5,40    | 5,07   | 5,23         | 0,33   | 0,09 | 0,92757 | 0,979         | 0        |
| 482  | hsa-miR-181c-5p | 22      | 18     | 10,07   | 10,03  | 10,05        | 0,03   | 0,09 | 0,92988 | 0,979         | 0        |
| 1610 | hsa-miR-411-5p  | 25      | 19     | 8,71    | 8,74   | 8,72         | -0,03  | 0,08 | 0,93614 | 0,979         | 0        |
| 1996 | hsa-miR-454-5p  | 12      | 7      | 11,69   | 11,61  | 11,66        | 0,07   | 0,08 | 0,93757 | 0,979         | 0        |
| 473  | hsa-miR-150-5p  | 29      | 29     | 2,26    | 2,22   | 2,24         | 0,04   | 0,08 | 0,93952 | 0,979         | 0        |
| 1338 | hsa-miR-7-1-3p  | 20      | 20     | 8,89    | 8,93   | 8,91         | -0,03  | 0,08 | 0,93985 | 0,979         | 0        |
| 2395 | hsa-miR-518e-3p | 17      | 12     | 8,99    | 9,08   | 9,03         | -0,09  | 0,07 | 0,94183 | 0,979         | 0        |
| 1182 | hsa-miR-124-3p  | 26      | 24     | 6,97    | 6,92   | 6,95         | 0,04   | 0,07 | 0,94321 | 0,979         | 0        |
| 1608 | hsa-miR-449b-5p | 21      | 21     | 9,24    | 9,20   | 9,22         | 0,05   | 0,07 | 0,94448 | 0,979         | 0        |
| 2353 | hsa-miR-615-5p  | 8       | 7      | 10,82   | 10,87  | 10,84        | -0,06  | 0,06 | 0,95198 | 0,984         | 0        |
| 2413 | hsa-miR-522-3p  | 28      | 24     | 5,32    | 5,25   | 5,29         | 0,08   | 0,05 | 0,95945 | 0,984         | 0        |
| 2218 | hsa-miR-10b-5p  | 26      | 28     | 8,05    | 8,08   | 8,06         | -0,03  | 0,05 | 0,96106 | 0,984         | 0        |
| 2328 | hsa-miR-760     | 14      | 16     | 8,97    | 9,01   | 8,99         | -0,04  | 0,05 | 0,96424 | 0,984         | 0        |
| 2248 | hsa-miR-142-5p  | 20      | 8      | 10,54   | 10,52  | 10,53        | 0,02   | 0,04 | 0,96530 | 0,984         | 0        |
| 2093 | hsa-miR-486-3p  | 21      | 22     | 7,77    | 7,79   | 7,78         | -0,02  | 0,04 | 0,96548 | 0,984         | 0        |
| 1043 | hsa-miR-497-5p  | 21      | 17     | 9,71    | 9,73   | 9,72         | -0,02  | 0,04 | 0,96836 | 0,984         | 0        |
| 515  | hsa-miR-212-3p  | 25      | 24     | 8,32    | 8,30   | 8,31         | 0,01   | 0,04 | 0,97074 | 0,984         | 0        |
| 2281 | hsa-miR-193a-5p | 25      | 26     | 7,18    | 7,17   | 7,18         | 0,01   | 0,03 | 0,97396 | 0,984         | 0        |
| 1153 | hsa-miR-517c-3p | 14      | 8      | 10,49   | 10,47  | 10,48        | 0,02   | 0,03 | 0,97741 | 0,984         | 0        |
| 2106 | hsa-miR-188-3p  | 17      | 13     | 5,94    | 5,92   | 5,93         | 0,02   | 0,03 | 0,97803 | 0,984         | 0        |
| 1582 | hsa-miR-638     | 18      | 17     | 10,14   | 10,12  | 10,13        | 0,02   | 0,03 | 0,97929 | 0,984         | 0        |
| 1988 | hsa-miR-598-3p  | 16      | 11     | 9,93    | 9,92   | 9,93         | 0,01   | 0,02 | 0,98175 | 0,984         | 0        |
| 2358 | hsa-miR-489-3p  | 26      | 26     | 7,90    | 7,89   | 7,90         | 0,01   | 0,01 | 0,98923 | 0,989         | 0        |

ID: microRNA miRBase identifier; #NR: number of non-responders expressing corresponding miRNA; #R: number of responders expressing corresponding miRNA; NR\_MEAN: normalized miRNA expression ( $\Delta$ CT) mean of non-responders; R\_MEAN: normalized miRNA expression ( $\Delta$ CT) mean of responders; AVE\_EXPR: average normalized miRNA expression ( $\Delta$ CT); LOG2FC: log2 fold change; T: T value; P P value; ADJ\_P(BH): Benjamini-Hochberg (BH) adjusted P-value based on the false discovery rate (FDR); SELECTED: miRNA selected for validation in the validation cohort

**Table S2.** Multivariate Cox regression analyses in the learning set for individual selected miRNAs and including risk factors as categorical covariates separately and together ( $P < 0.05$  are indicated in gray).

|                 | Univariate | Multivariate                                                                                                        |           |             |              |              |           |              |           |
|-----------------|------------|---------------------------------------------------------------------------------------------------------------------|-----------|-------------|--------------|--------------|-----------|--------------|-----------|
|                 | MIRNA      | MIRNA+DFS                                                                                                           | MIRNA+ADJ | MIRNA+E COG | MIRNA+H ISTO | MIRNA+G RADE | MIRNA+REC | MIRNA+M ETAS | MIRNA+ALL |
| hsa-miR-19b-3p  | 0,411      | 0,346                                                                                                               | 0,327     | 0,550       | 0,532        | 0,304        | 0,248     | 0,764        | 0,524     |
| hsa-miR-21-5p   | 0,015      | 0,030                                                                                                               | 0,018     | 0,026       | 0,038        | 0,008        | 0,017     | 0,025        | 0,004     |
| hsa-miR-9-5p    | 0,016      | 0,008                                                                                                               | 0,020     | 0,029       | 0,033        | 0,017        | 0,102     | 0,040        | 0,202     |
| hsa-miR-590-5p  | 0,204      | 0,628                                                                                                               | 0,241     | 0,297       | 0,196        | 0,202        | 0,396     | 0,209        | 0,994     |
| hsa-miR-106b-5p | 0,729      | 0,992                                                                                                               | 0,728     | 0,920       | 0,993        | 0,629        | 0,510     | 0,933        | 0,718     |
| hsa-miR-20a-5p  | 0,043      | 0,108                                                                                                               | 0,055     | 0,070       | 0,062        | 0,025        | 0,047     | 0,075        | 0,035     |
| hsa-miR-19a-3p  | 0,259      | 0,514                                                                                                               | 0,307     | 0,371       | 0,344        | 0,113        | 0,226     | 0,271        | 0,114     |
| hsa-miR-210-3p  | 0,045      | 0,029                                                                                                               | 0,035     | 0,073       | 0,107        | 0,028        | 0,075     | 0,132        | 0,219     |
| hsa-miR-224-5p  | 0,005      | 0,022                                                                                                               | 0,002     | 0,009       | 0,029        | 0,005        | 0,152     | 0,007        | 0,087     |
| hsa-miR-155-5p  | 0,138      | 0,078                                                                                                               | 0,140     | 0,209       | 0,154        | 0,178        | 0,060     | 0,288        | 0,067     |
| hsa-miR-28-3p   | 0,134      | 0,159                                                                                                               | 0,134     | 0,201       | 0,242        | 0,118        | 0,235     | 0,306        | 0,507     |
| DFS             | 0,069      | DFS $\leq$ 24 months [n=15] vs. DFS > 24 months [n=27] vs. M1 at diagnosis [n=16]                                   |           |             |              |              |           |              |           |
| ADJ             | 0,401      | adjuvant chemotherapy (yes [n=27] vs. no [n=31])                                                                    |           |             |              |              |           |              |           |
| ECOG            | 0,054      | ECOG performance score (ECOG 0-1 [n=56] vs. ECOG $\geq$ 2 [n=2])                                                    |           |             |              |              |           |              |           |
| HISTO           | 0,144      | histologic subtype (ductal [n=43] vs. lobular [n=11] vs. others [n=3])                                              |           |             |              |              |           |              |           |
| GRADE           | 0,258      | grade (1-2 [n=35] vs. 3 [n=22])                                                                                     |           |             |              |              |           |              |           |
| REC             | 0,134      | receptor status (hormone receptor positive/HER2 negative [n=42] vs. HER2 positive [n=3] vs. triple-negative [n=13]) |           |             |              |              |           |              |           |
| METAS           | 0,049      | location of metastases (visceral [n=21] vs. non-visceral [n=37])                                                    |           |             |              |              |           |              |           |

**Table S3.** Baseline characteristics of the biomarker cohort vs ITT population (2nd-line efficacy) of the TANIA trial.

| Characteristic                          | TANIA biomarker cohort |                      | TANIA ITT population  |                       |
|-----------------------------------------|------------------------|----------------------|-----------------------|-----------------------|
|                                         | CT alone<br>(N = 105)  | BEV + CT<br>(N = 98) | CT alone<br>(N = 247) | BEV + CT<br>(N = 247) |
| <b>TNBC</b>                             | 33 (31%)               | 25 (26%)             | 57 (23%)              | 49 (20%)              |
| <b>HR-positive</b>                      | 72 (69%)               | 73 (74%)             | 188 (76%)             | 198 (80%)             |
| <b>1<sup>st</sup>-line PFS &lt; 6 m</b> | 16 (15%)               | 8 (8%)               | 32 (13%)              | 25 (10%)              |

|                            |            |            |            |            |
|----------------------------|------------|------------|------------|------------|
| <b>Choice of CT</b>        |            |            |            |            |
| Taxane                     | 16 (15%)   | 12 (12%)   | 32 (13%)   | 32 (13%)   |
| Non-taxane                 | 79 (75%)   | 70 (72%)   | 191 (77%)  | 188 (76%)  |
| Vinorelbine                | 10 (10%)   | 16 (16%)   | 24 (10%)   | 27 (11%)   |
| <b>LDH &gt; 1.5 ULN</b>    | 23 (22%)   | 14 (14%)   | 40 (16%)   | 37 (15%)   |
| <b>Age, years</b>          |            |            |            |            |
| Median (range)             | 53 (30-76) | 55 (24-80) | 54 (30-77) | 56 (24-81) |
| <b>DFI ≤ 24 months</b>     | 24 (23%)   | 21 (21%)   | 58 (23%)   | 53 (21%)   |
| <b>≥3 metastatic sites</b> | 36 (34%)   | 23 (23%)   | 88 (36%)   | 80 (32%)   |
| <b>Visceral metastases</b> |            |            |            |            |
| metastases                 | 76 (72%)   | 70 (71%)   | 190 (77%)  | 186 (75%)  |
| Liver metastases           | 65 (62%)   | 54 (55%)   | 151 (61%)  | 143 (58%)  |

TNBC: triple-negative breast cancer; HR: hormone receptor; PFS: progression-free survival; LDH: lactate dehydrogenase; ULN: upper limit of normal; DFI: disease-free interval; BEV: bevacizumab; CT: chemotherapy; ITT: intent-to-treat;

**Table S4.** Efficacy in the biomarker cohort vs ITT population.

| Endpoint                       | TANIA biomarker cohort  |                      | TANIA ITT population    |                       |
|--------------------------------|-------------------------|----------------------|-------------------------|-----------------------|
|                                | CT alone<br>(N = 105)   | BEV + CT<br>(N = 98) | CT alone<br>(N = 247)   | BEV + CT<br>(N = 247) |
| <b>2<sup>nd</sup>-line PFS</b> |                         |                      |                         |                       |
| Events, n (%)                  | 96 (91%)                | 93 (98%)             | 203 (82%)               | 204 (83%)             |
| Median, months (95%CI)         | 3.9 (2.8-5.8)           | 5.4 (4.3-7.3)        | 4.2 (3.9-4.7)           | 6.3 (5.4-7.2)         |
| Stratified HR (95%CI)          | <b>0.86</b> (0.65-1.15) |                      | <b>0.75</b> (0.61-0.93) |                       |
| log-rank p-value               | 0.310                   |                      | 0.007                   |                       |
| <b>OS</b>                      |                         |                      |                         |                       |
| Events, n (%)                  | 72 (69%)                | 73 (74%)             | 156 (63%)               | 163 (66%)             |
| Median, months (95%CI)         | 17.4 (13.0-20.7)        | 18.1 (14.6-20.9)     | 18.7 (15.4-21.2)        | 19.7 (17.6-21.0)      |
| Stratified HR (95%CI)          | <b>0.95</b> (0.69-1.32) |                      | <b>0.96</b> (0.76-1.21) |                       |
| log-rank p-value               | 0.745                   |                      | 0.725                   |                       |

PFS: progression-free survival; CI: confidence interval; HR: hazard ratio; OS: overall survival; BEV: bevacizumab; CT: chemotherapy; ITT: intent-to-treat;

**Figure S1.** TANIA trial design

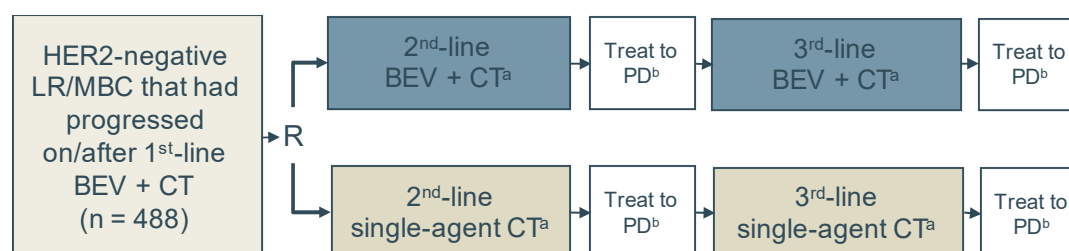

**Stratification factors:**

- Hormone receptor status
- Time to first progression (<6 vs. ≥ 6 months)
- Choice of CT (taxane vs. non-taxane vs. vinorelbine)
- LDH concentration (≤ 1.5 vs. > 1.5 x ULN)

<sup>a</sup> Choice of CT at investigator's discretion. <sup>b</sup> Or unacceptable toxicity or withdrawal of consent. LDH lactate dehydrogenase; PD progressive disease; ULN upper limit of normal.



**Figure S2.** Heatmap of mean centered expression of selected miRNAs (blue down regulation and red upregulation compared to the respective mean; log2 fold changes are color coded according to the legend). Progression free survival (PFS) of the respective patients is shown as bars, gray means progression occurred and light-grey progression was not observed (censored data).

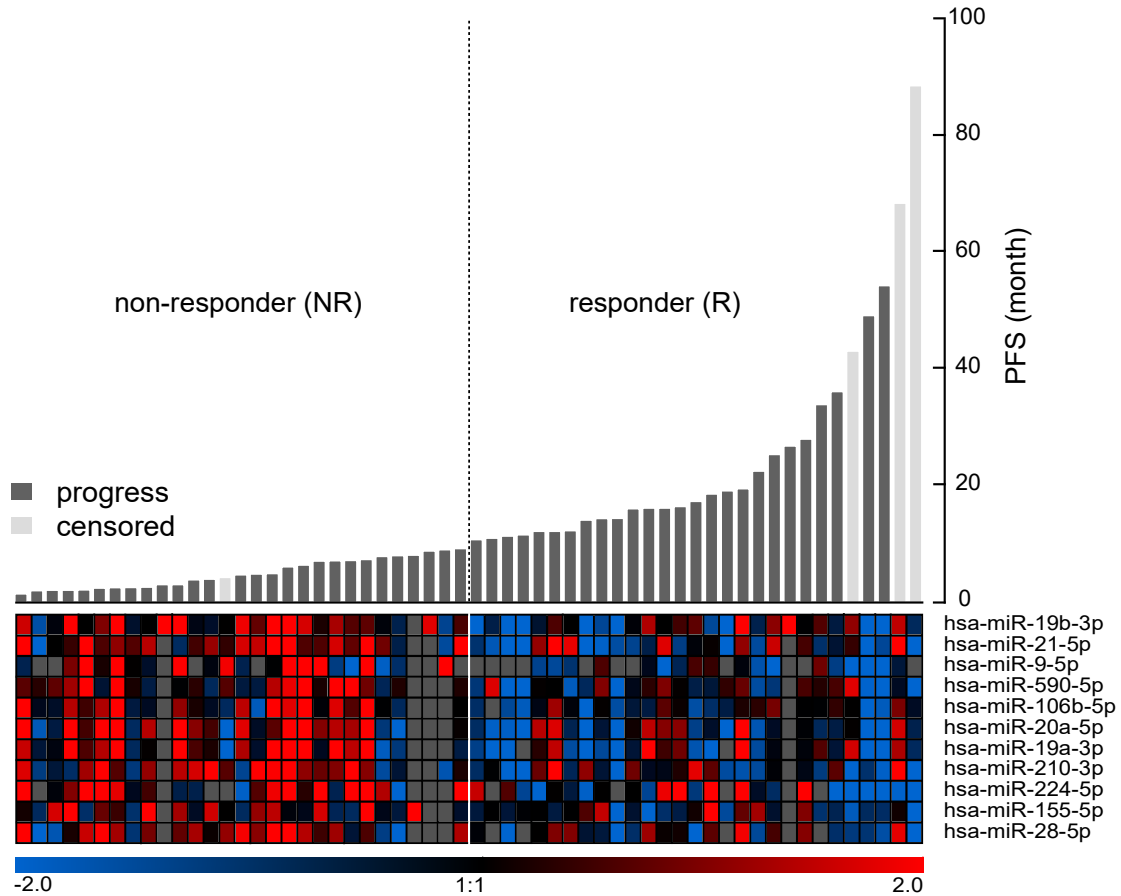

**Figure S3.** Boxplots for normalized miRNA expression ( $\Delta C_T$ ) in the responder group (R) vs. the non-responder group (NR). Note: high  $\Delta C_T$  levels means lower expression and low  $\Delta C_T$  levels means higher expression. P-values were adjusted based on the false discovery rate (FDR) according to Benjamini-Hochberg method and provided in brackets.

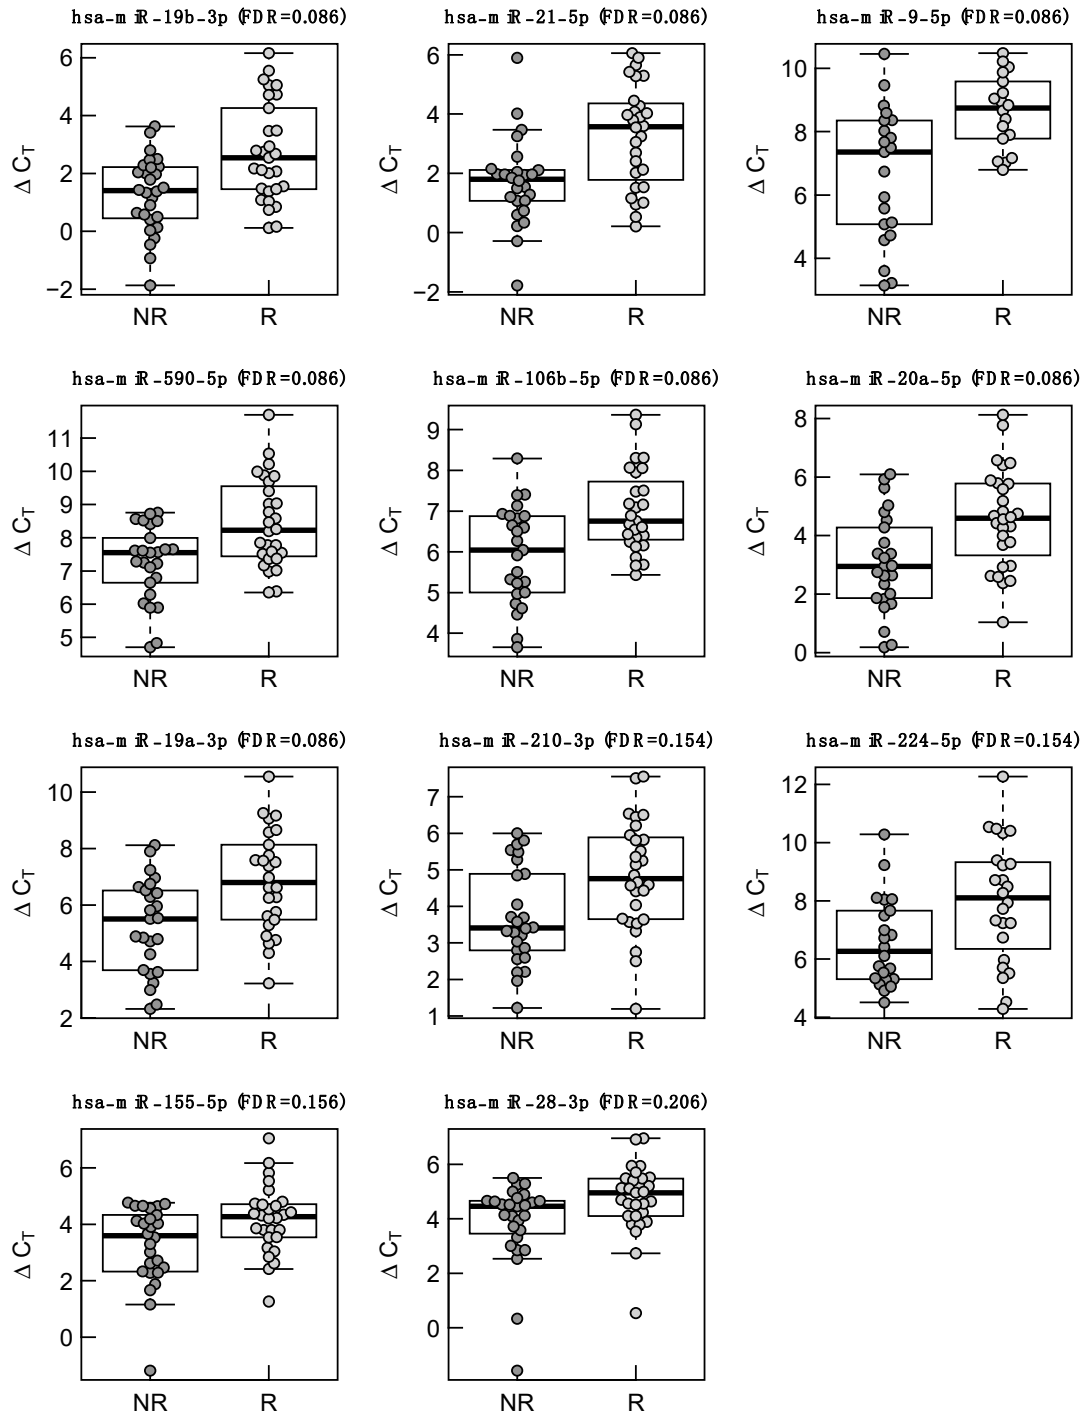



**Figure S4.** Kaplan-Meier curves of progression-free survival (PFS) according to expression levels of all 12 selected miRNAs in the bevacizumab treatment group and the control group. Patients are dichotomized based on median expression in the respective group. *P*-values were calculated with log-rank test.

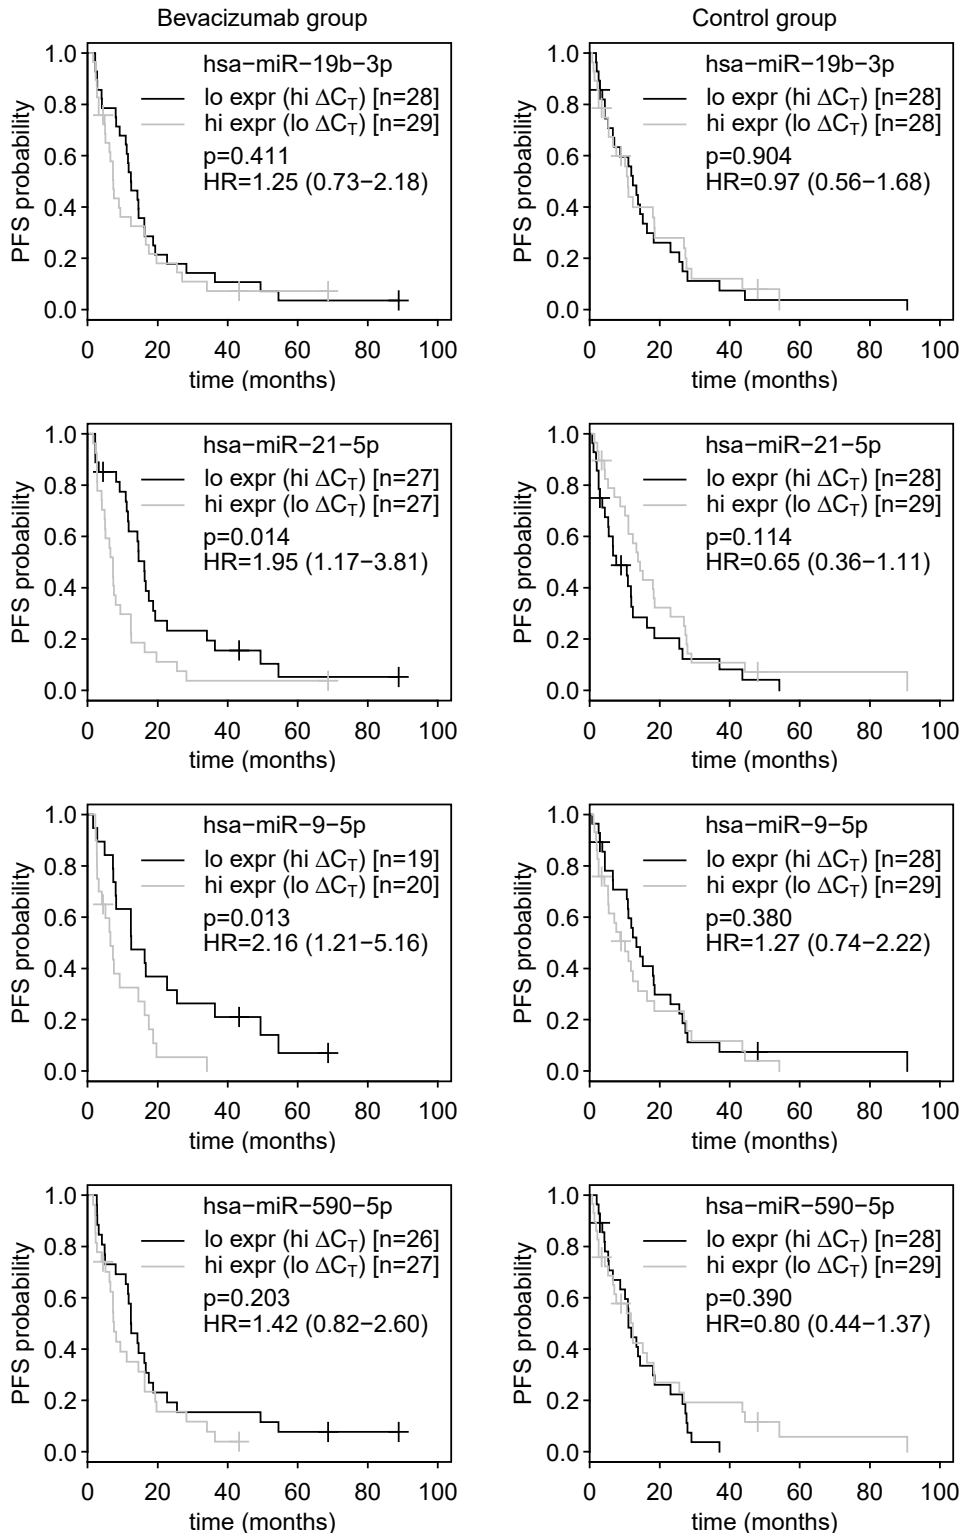

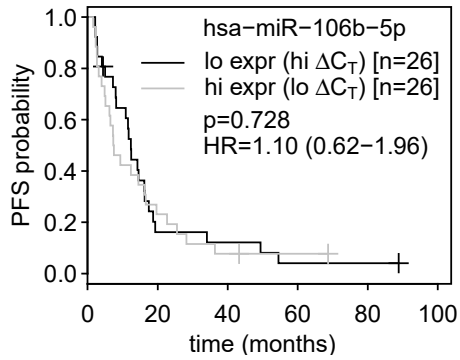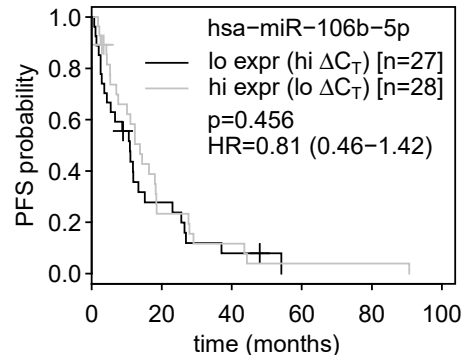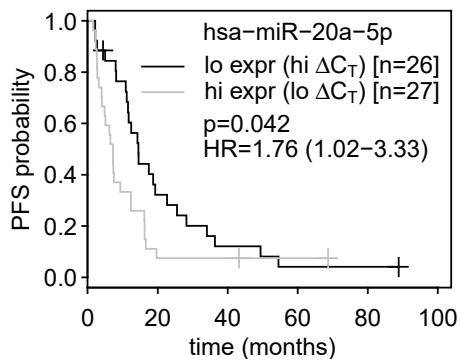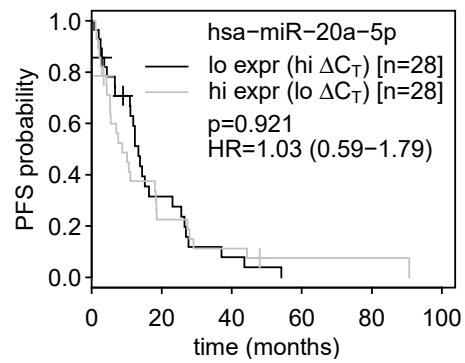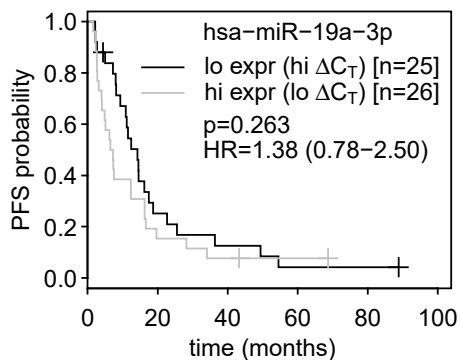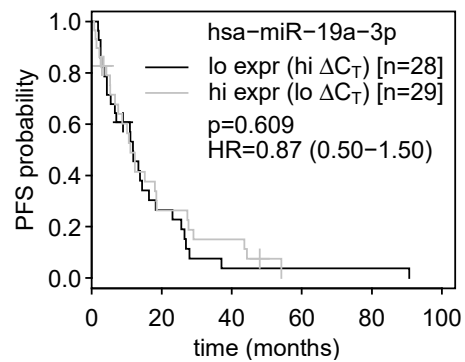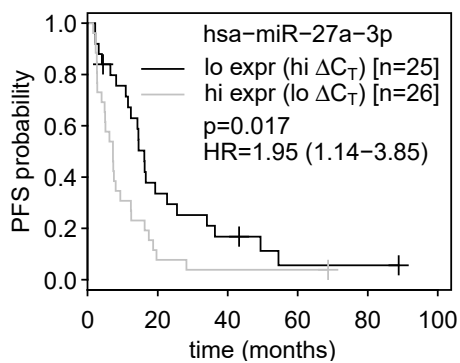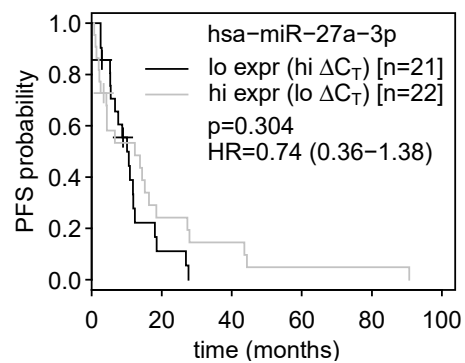

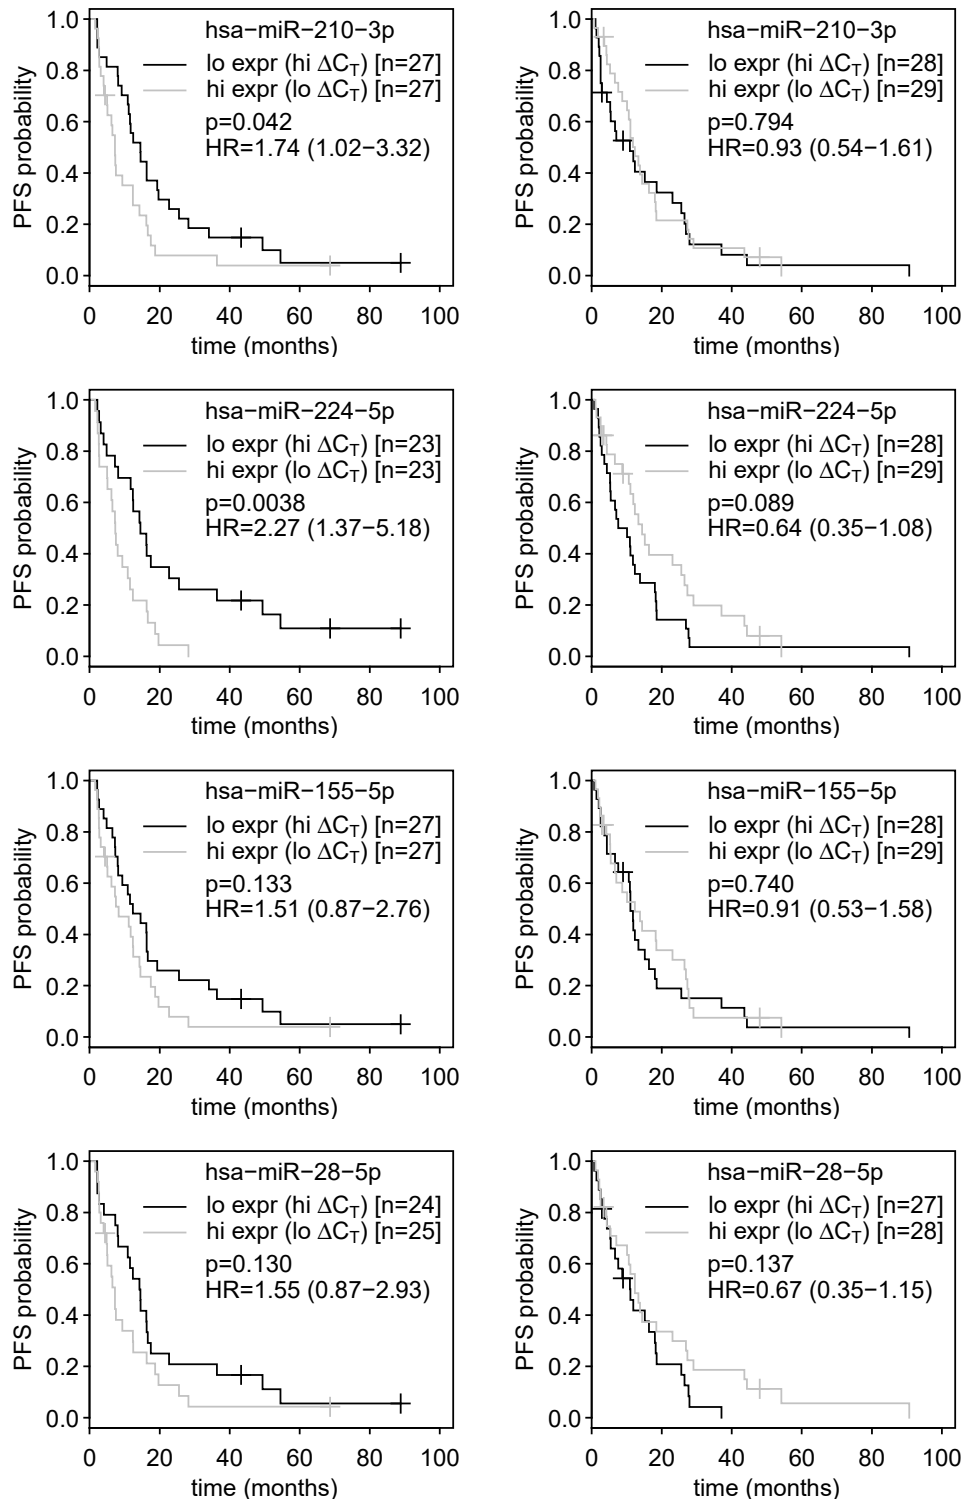

**Figure S5.** Kaplan-Meier curves of overall survival (OS) in the learning set according to expression levels of all 12 selected miRNAs in the bevacizumab treatment group and the

control group. Patients are dichotomized based on median expression in the respective group. *P*-values were calculated with log-rank test.

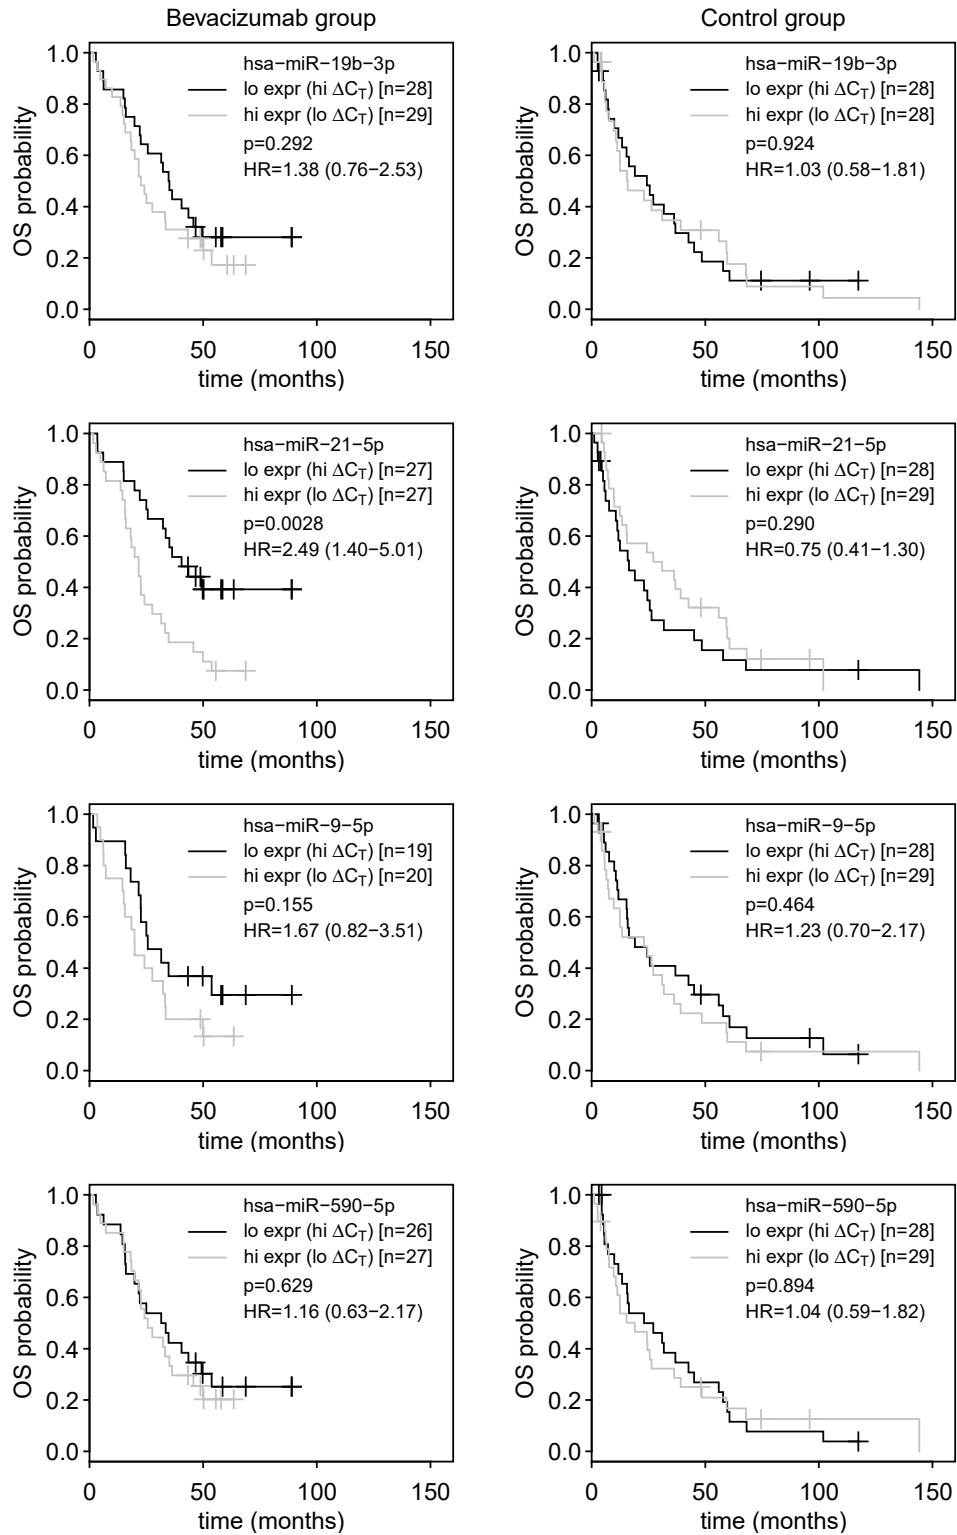

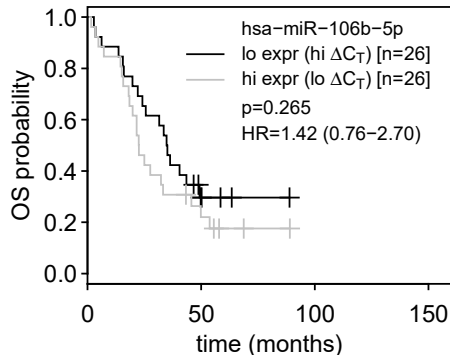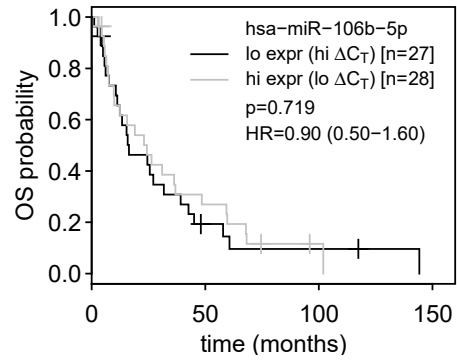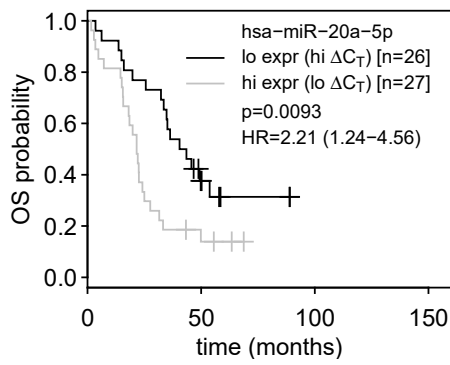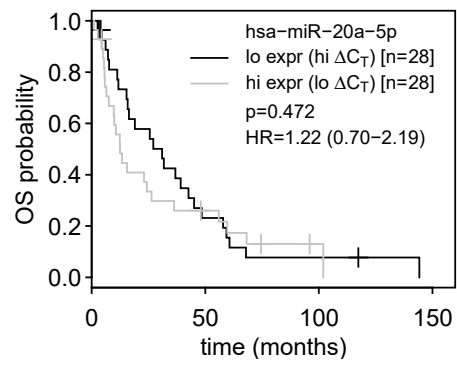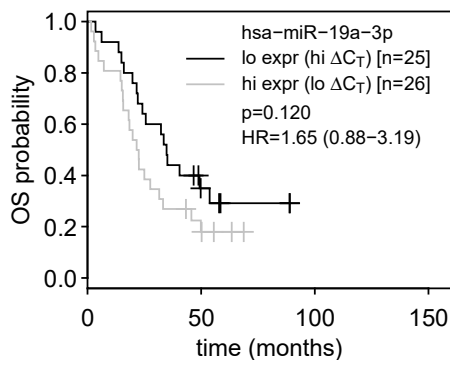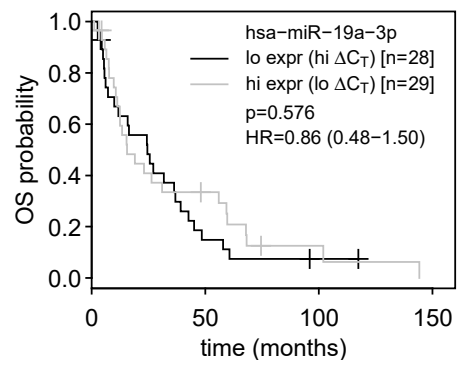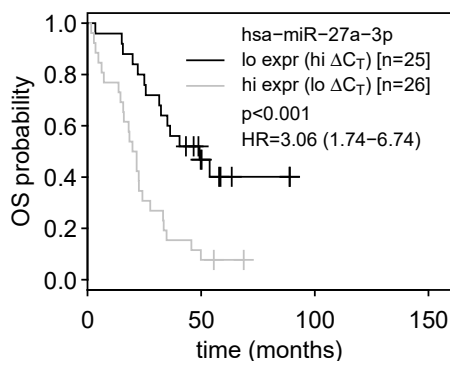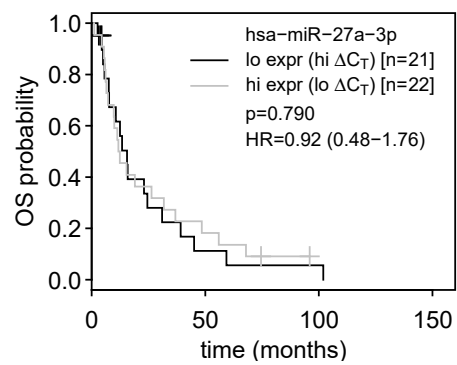

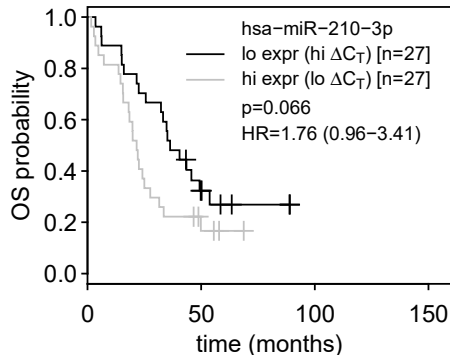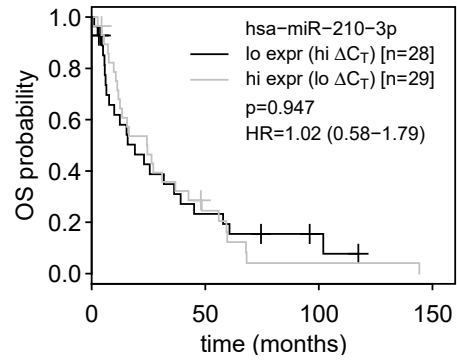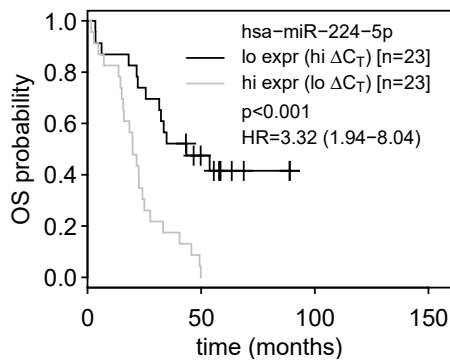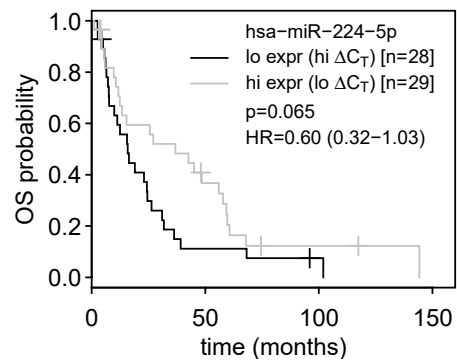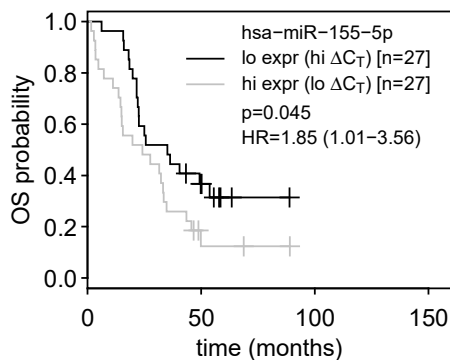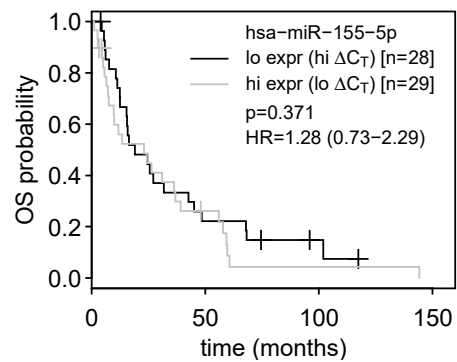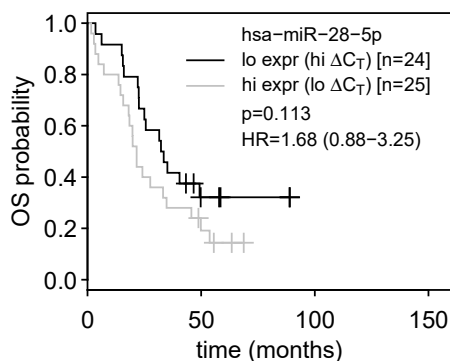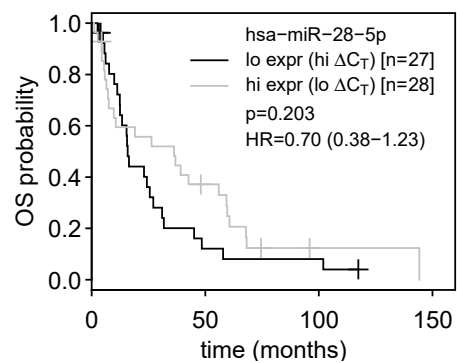

**Figure S6.** Second-line PFS (A) and OS (B) by miR-21-5p expression in the TANIA trial. (\*high expression of miR-21a-5p was defined as  $\Delta CT \leq 2.080$  and low expression as  $\Delta CT > 2.080$ ).

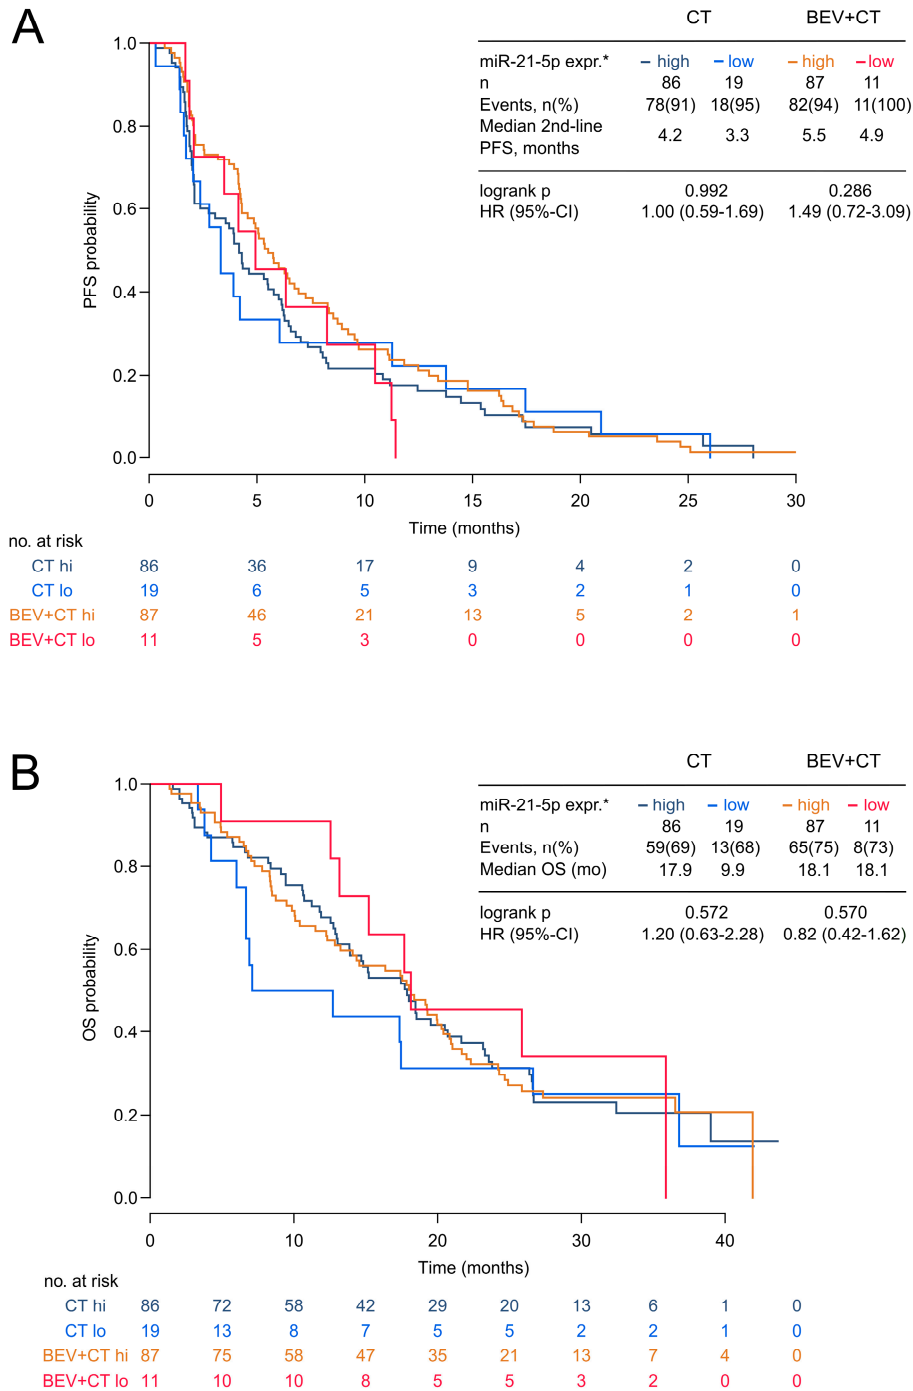



**Figure S7.** Kaplan-Meier curves of overall survival (OS) in the (A) TCGA and (B) METABRIC datasets according to miR-20a-5p expression in breast cancer tissue dichotomized by median expression levels. In both datasets, all data were included without restriction according to clinical or molecular characteristics.

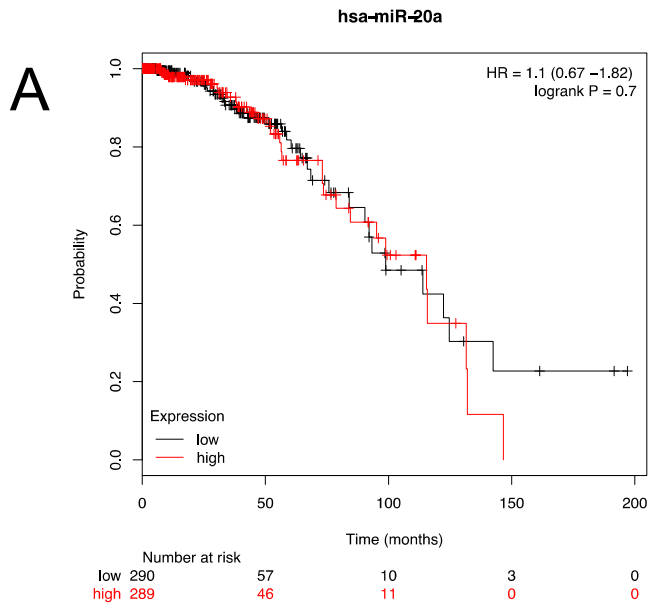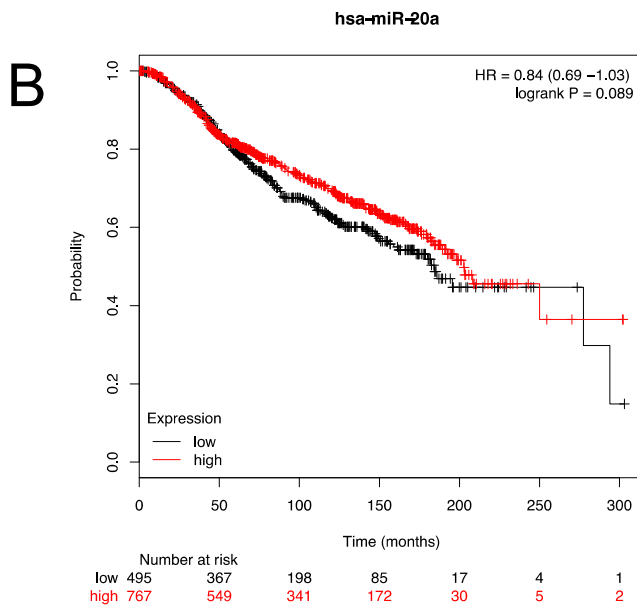

Supplement: jcm-09-01663-s001.pdf [file jcm-09-01663-s001.pdf]
